# Supplementary material for: YOLOv8-DEE: a high-precision model for printed circuit board defect detection
Source: PeerJ Comput Sci. 2024 Dec 12;10:e2548. doi: 10.7717/peerj-cs.2548 (PMC11888845; doi:10.7717/peerj-cs.2548)
Supplement: Supplemental Information 2 [file peerj-cs-10-2548-s002.xlsx]

## Sheet:  Sheet1
File Name	Line Number	Chinese Text	English Translation
FAQ Summary.md	1	问题汇总的博客地址为[https://blog.csdn.net/weixin_44791964/article/details/107517428](https://blog.csdn.net/weixin_44791964/article/details/107517428)。	The blog address for the problem summary is [https://blog.csdn.net/weixin_44791964/article/details/107517428](https://blog.csdn.net/weixin_44791964/article/details/107517428).
FAQ Summary.md	2
FAQ Summary.md	3	# 问题汇总	# Question Summary
FAQ Summary.md	4	## 1、下载问题	## 1. Download issues
FAQ Summary.md	5	### a、代码下载	### a. Code download
FAQ Summary.md	6	**问：up主，可以给我发一份代码吗，代码在哪里下载啊？	**Question: Upmaster, can you send me a code? Where can I download the code?
FAQ Summary.md	7	答：Github上的地址就在视频简介里。复制一下就能进去下载了。**	A: The Github address is in the video description. Copy it and you can download it. **
FAQ Summary.md	8
FAQ Summary.md	9	**问：up主，为什么我下载的代码提示压缩包损坏？	**Question: Upmaster, why does the code I downloaded prompt that the compressed package is damaged?
FAQ Summary.md	10	答：重新去Github下载。**	A: Go to Github and download it again. **
FAQ Summary.md	11
FAQ Summary.md	12	**问：up主，为什么我下载的代码和你在视频以及博客上的代码不一样？	**Q: Upmaster, why is the code I downloaded different from the code in your video and blog?
FAQ Summary.md	13	答：我常常会对代码进行更新，最终以实际的代码为准。**	A: I often update the code, and the actual code will prevail. **
FAQ Summary.md	14
FAQ Summary.md	15	### b、 权值下载	### b. Download weights
FAQ Summary.md	16	**问：up主，为什么我下载的代码里面，model_data下面没有.pth或者.h5文件？	**Question: Upmaster, why is there no .pth or .h5 file under model_data in the code I downloaded?
FAQ Summary.md	17	答：我一般会把权值上传到Github和百度网盘，在GITHUB的README里面就能找到。**	A: I usually upload the weights to Github and Baidu Cloud Disk, which can be found in GITHUB's README. **
FAQ Summary.md	18
FAQ Summary.md	19	### c、 数据集下载	### c. Dataset download
FAQ Summary.md	20	**问：up主，XXXX数据集在哪里下载啊？	**Question: Upmaster, where can I download the XXXX dataset?
FAQ Summary.md	21	答：一般数据集的下载地址我会放在README里面，基本上都有，没有的话请及时联系我添加，直接发github的issue即可**。	A: I will put the download address of general data sets in README. Basically, it is available. If it is not available, please contact me in time to add it. You can directly send an issue on GitHub**.
FAQ Summary.md	22
FAQ Summary.md	23	## 2、环境配置问题	## 2. Environmental configuration issues
FAQ Summary.md	24	### a、20系列及以下显卡环境配置	### a. Graphics card environment configuration for 20 series and below
FAQ Summary.md	25	**pytorch代码对应的pytorch版本为1.2，博客地址对应**[https://blog.csdn.net/weixin_44791964/article/details/106037141](https://blog.csdn.net/weixin_44791964/article/details/106037141)。	**The pytorch version corresponding to the pytorch code is 1.2, and the blog address corresponds to **[https://blog.csdn.net/weixin_44791964/article/details/106037141](https://blog.csdn.net/weixin_44791964/article/details/106037141).
FAQ Summary.md	26
FAQ Summary.md	27	**keras代码对应的tensorflow版本为1.13.2，keras版本是2.1.5，博客地址对应**[https://blog.csdn.net/weixin_44791964/article/details/104702142](https://blog.csdn.net/weixin_44791964/article/details/104702142)。	**The tensorflow version corresponding to the keras code is 1.13.2, the keras version is 2.1.5, and the blog address corresponds to **[https://blog.csdn.net/weixin_44791964/article/details/104702142](https://blog.csdn.net/weixin_44791964/article/details/104702142).
FAQ Summary.md	28
FAQ Summary.md	29	**tf2代码对应的tensorflow版本为2.2.0，无需安装keras，博客地址对应**[https://blog.csdn.net/weixin_44791964/article/details/109161493](https://blog.csdn.net/weixin_44791964/article/details/109161493)。	**The tensorflow version corresponding to the tf2 code is 2.2.0. There is no need to install keras. The blog address corresponds to **[https://blog.csdn.net/weixin_44791964/article/details/109161493](https://blog.csdn.net/weixin_44791964/article/details/109161493).
FAQ Summary.md	30
FAQ Summary.md	31	**问：你的代码某某某版本的tensorflow和pytorch能用嘛？	**Q: Can your code be used with certain versions of tensorflow and pytorch?
FAQ Summary.md	32	答：最好按照我推荐的配置，配置教程也有！其它版本的我没有试过！可能出现问题但是一般问题不大。仅需要改少量代码即可。**	A: It is best to follow the configuration I recommend. There is also a configuration tutorial! I have not tried other versions! There may be problems, but generally not a big problem. Only a small amount of code needs to be changed. **
FAQ Summary.md	33
FAQ Summary.md	34	### b、30系列显卡环境配置	### b. 30 series graphics card environment configuration
FAQ Summary.md	35	30系显卡由于框架更新不可使用上述环境配置教程。	The above environment configuration tutorial cannot be used for 30 series graphics cards due to framework updates.
FAQ Summary.md	36	当前我已经测试的可以用的30显卡配置如下：	The 30 graphics card configurations that I have tested and can use are as follows:
FAQ Summary.md	37	**pytorch代码对应的pytorch版本为1.7.0，cuda为11.0，cudnn为8.0.5，博客地址对应**[https://blog.csdn.net/weixin_44791964/article/details/120668551](https://blog.csdn.net/weixin_44791964/article/details/120668551)。	**The pytorch version corresponding to the pytorch code is 1.7.0, cuda is 11.0, cudnn is 8.0.5, and the blog address corresponds to **[https://blog.csdn.net/weixin_44791964/article/details/120668551](https://blog.csdn.net/weixin_44791964/article/details/120668551).
FAQ Summary.md	38
FAQ Summary.md	39	**keras代码无法在win10下配置cuda11，在ubuntu下可以百度查询一下，配置tensorflow版本为1.15.4，keras版本是2.1.5或者2.3.1（少量函数接口不同，代码可能还需要少量调整。）**	**The keras code cannot be configured with cuda11 under Windows 10. You can search on Baidu under Ubuntu. The configured tensorflow version is 1.15.4, and the keras version is 2.1.5 or 2.3.1 (a few function interfaces are different, and the code may need a little adjustment.)**
FAQ Summary.md	40
FAQ Summary.md	41	**tf2代码对应的tensorflow版本为2.4.0，cuda为11.0，cudnn为8.0.5，博客地址对应为**[https://blog.csdn.net/weixin_44791964/article/details/120657664](https://blog.csdn.net/weixin_44791964/article/details/120657664)。	**The tensorflow version corresponding to the tf2 code is 2.4.0, cuda is 11.0, cudnn is 8.0.5, and the corresponding blog address is **[https://blog.csdn.net/weixin_44791964/article/details/120657664](https://blog.csdn.net/weixin_44791964/article/details/120657664).
FAQ Summary.md	42
FAQ Summary.md	43	### c、CPU环境配置	### c. CPU environment configuration
FAQ Summary.md	44	**pytorch代码对应的pytorch-cpu版本为1.2，博客地址对应**[https://blog.csdn.net/weixin_44791964/article/details/120655098](https://blog.csdn.net/weixin_44791964/article/details/120655098)	**The pytorch code corresponds to the pytorch-cpu version 1.2, and the blog address corresponds to**[https://blog.csdn.net/weixin_44791964/article/details/120655098](https://blog.csdn.net/weixin_44791964/article/details/120655098)
FAQ Summary.md	45
FAQ Summary.md	46	**keras代码对应的tensorflow-cpu版本为1.13.2，keras版本是2.1.5，博客地址对应**[https://blog.csdn.net/weixin_44791964/article/details/120653717](https://blog.csdn.net/weixin_44791964/article/details/120653717)。	**The tensorflow-cpu version corresponding to the keras code is 1.13.2, the keras version is 2.1.5, and the blog address corresponds to **[https://blog.csdn.net/weixin_44791964/article/details/120653717](https://blog.csdn.net/weixin_44791964/article/details/120653717).
FAQ Summary.md	47
FAQ Summary.md	48	**tf2代码对应的tensorflow-cpu版本为2.2.0，无需安装keras，博客地址对应**[https://blog.csdn.net/weixin_44791964/article/details/120656291](https://blog.csdn.net/weixin_44791964/article/details/120656291)。	**The tensorflow-cpu version corresponding to the tf2 code is 2.2.0. There is no need to install keras. The blog address corresponds to **[https://blog.csdn.net/weixin_44791964/article/details/120656291](https://blog.csdn.net/weixin_44791964/article/details/120656291).
FAQ Summary.md	49
FAQ Summary.md	50
FAQ Summary.md	51	### d、GPU利用问题与环境使用问题	### d. GPU utilization and environment usage issues
FAQ Summary.md	52	**问：为什么我安装了tensorflow-gpu但是却没用利用GPU进行训练呢？	**Q: Why did I install tensorflow-gpu but not use the GPU for training?
FAQ Summary.md	53	答：确认tensorflow-gpu已经装好，利用pip list查看tensorflow版本，然后查看任务管理器或者利用nvidia命令看看是否使用了gpu进行训练，任务管理器的话要看显存使用情况。**	A: Make sure tensorflow-gpu has been installed, use pip list to check the tensorflow version, and then check the task manager or use the nvidia command to see if the gpu is used for training. For the task manager, check the video memory usage. **
FAQ Summary.md	54
FAQ Summary.md	55	**问：up主，我好像没有在用gpu进行训练啊，怎么看是不是用了GPU进行训练？	**Question: Upmaster, I don’t seem to be using GPU for training. How can I tell whether I am using GPU for training?
FAQ Summary.md	56	答：查看是否使用GPU进行训练一般使用NVIDIA在命令行的查看命令。在windows电脑中打开cmd然后利用nvidia-smi指令查看GPU利用情况**	A: To check whether the GPU is used for training, you can use NVIDIA's command line view command. Open cmd on a Windows computer and use the nvidia-smi command to check GPU utilization**
FAQ Summary.md	57	![在这里插入图片描述](https://img-blog.csdnimg.cn/f88ef794c9a341918f000eb2b1c67af6.png?x-oss-process=image/watermark,type_d3F5LXplbmhlaQ,shadow_50,text_Q1NETiBAQnViYmxpaWlpbmc=,size_20,color_FFFFFF,t_70,g_se,x_16)	![Insert image description here](https://img-blog.csdnimg.cn/f88ef794c9a341918f000eb2b1c67af6.png?x-oss-process=image/watermark,type_d3F5LXplbmhlaQ,shadow_50,text_Q1NETiBAQnViYmxpaWlpbmc=,size_20,color_FFFFFF,t_70,g_se,x_16)
FAQ Summary.md	58	**如果要一定看任务管理器的话，请看性能部分GPU的显存是否利用，或者查看任务管理器的Cuda，而非Copy。**	**If you must check the Task Manager, please check the Performance section to see if the GPU's video memory is being used, or check Cuda in the Task Manager instead of Copy. **
FAQ Summary.md	59	![在这里插入图片描述](https://img-blog.csdnimg.cn/20201013234241524.png?x-oss-process=image/watermark,type_ZmFuZ3poZW5naGVpdGk,shadow_10,text_aHR0cHM6Ly9ibG9nLmNzZG4ubmV0L3dlaXhpbl80NDc5MTk2NA==,size_16,color_FFFFFF,t_70#pic_center)	![Insert image description here](https://img-blog.csdnimg.cn/20201013234241524.png?x-oss-process=image/watermark,type_ZmFuZ3poZW5naGVpdGk,shadow_10,text_aHR0cHM6Ly9ibG9nLmNzZG4ubmV0L3dlaXhpbl80NDc5MTk2NA==,size_16,color_FFFFFF,t_70#pic_center)
FAQ Summary.md	60
FAQ Summary.md	61	### e、DLL load failed: 找不到指定的模块	### e. DLL load failed: The specified module could not be found
FAQ Summary.md	62	**问：出现如下错误**	**Q: The following error occurred**
FAQ Summary.md	63	```python	```Python
FAQ Summary.md	64	Traceback (most recent call last):	Traceback (most recent call last):
FAQ Summary.md	65	File "C:\Users\focus\Anaconda3\ana\envs\tensorflow-gpu\lib\site-packages\tensorflow\python\pywrap_tensorflow.py", line 58, in <module>	File "C:\Users\focus\Anaconda3\ana\envs\tensorflow-gpu\lib\site-packages\tensorflow\python\pywrap_tensorflow.py", line 58, in <module>
FAQ Summary.md	66	from tensorflow.python.pywrap_tensorflow_internal import *	from tensorflow.python.pywrap_tensorflow_internal import *
FAQ Summary.md	67	File "C:\Users\focus\Anaconda3\ana\envs\tensorflow-gpu\lib\site-packages\tensorflow\python\pywrap_tensorflow_internal.py", line 28, in <module>	File "C:\Users\focus\Anaconda3\ana\envs\tensorflow-gpu\lib\site-packages\tensorflow\python\pywrap_tensorflow_internal.py", line 28, in <module>
FAQ Summary.md	68	pywrap_tensorflow_internal = swig_import_helper()	pywrap_tensorflow_internal = swig_import_helper()
FAQ Summary.md	69	File "C:\Users\focus\Anaconda3\ana\envs\tensorflow-gpu\lib\site-packages\tensorflow\python\pywrap_tensorflow_internal.py", line 24, in swig_import_helper	File "C:\Users\focus\Anaconda3\ana\envs\tensorflow-gpu\lib\site-packages\tensorflow\python\pywrap_tensorflow_internal.py", line 24, in swig_import_helper
FAQ Summary.md	70	_mod = imp.load_module('_pywrap_tensorflow_internal', fp, pathname, description)	_mod = imp.load_module('_pywrap_tensorflow_internal', fp, pathname, description)
FAQ Summary.md	71	File "C:\Users\focus\Anaconda3\ana\envs\tensorflow-gpu\lib\imp.py", line 243, in load_modulereturn load_dynamic(name, filename, file)	File "C:\Users\focus\Anaconda3\ana\envs\tensorflow-gpu\lib\imp.py", line 243, in load_modulereturn load_dynamic(name, filename, file)
FAQ Summary.md	72	File "C:\Users\focus\Anaconda3\ana\envs\tensorflow-gpu\lib\imp.py", line 343, in load_dynamic	File "C:\Users\focus\Anaconda3\ana\envs\tensorflow-gpu\lib\imp.py", line 343, in load_dynamic
FAQ Summary.md	73	return _load(spec)	return _load(spec)
FAQ Summary.md	74	ImportError: DLL load failed: 找不到指定的模块。	ImportError: DLL load failed: The specified module could not be found.
FAQ Summary.md	75	```	```
FAQ Summary.md	76	**答：如果没重启过就重启一下，否则重新按照步骤安装，还无法解决则把你的GPU、CUDA、CUDNN、TF版本以及PYTORCH版本私聊告诉我。**	**A: If you haven't restarted, restart it. Otherwise, reinstall according to the steps. If the problem still cannot be solved, please privately message me your GPU, CUDA, CUDNN, TF version and PYTORCH version. **
FAQ Summary.md	77
FAQ Summary.md	78	### f、no module问题（no module name utils.utils、no module named 'matplotlib' ）	### f. no module problem (no module name utils.utils, no module named 'matplotlib')
FAQ Summary.md	79	**问：为什么提示说no module name utils.utils（no module name nets.yolo、no module name nets.ssd等一系列问题）啊？	**Q: Why does it say no module name utils.utils (no module name nets.yolo, no module name nets.ssd, and a series of other problems)?
FAQ Summary.md	80	答：utils并不需要用pip装，它就在我上传的仓库的根目录，出现这个问题的原因是根目录不对，查查相对目录和根目录的概念。查了基本上就明白了。**	A: utils does not need to be installed with pip. It is in the root directory of the repository I uploaded. The reason for this problem is that the root directory is incorrect. Check the concepts of relative directory and root directory. You will basically understand it after checking. * *
FAQ Summary.md	81
FAQ Summary.md	82	**问：为什么提示说no module name matplotlib（no module name PIL，no module name cv2等等）？	**Q: Why does the prompt say no module name matplotlib (no module name PIL, no module name cv2, etc.)?
FAQ Summary.md	83	答：这个库没安装打开命令行安装就好。pip install matplotlib**	A: If the library is not installed, just open the command line to install it. pip install matplotlib**
FAQ Summary.md	84
FAQ Summary.md	85	**问：为什么我已经用pip装了opencv（pillow、matplotlib等），还是提示no module name cv2？	**Q: Why does it still say "no module name cv2" even though I have installed opencv (pillow, matplotlib, etc.) using pip?
FAQ Summary.md	86	答：没有激活环境装，要激活对应的conda环境进行安装才可以正常使用**	A: If the environment is not activated, you need to activate the corresponding conda environment to install it before it can be used normally.
FAQ Summary.md	87
FAQ Summary.md	88	**问：为什么提示说No module named 'torch' ？	**Q: Why does it say No module named 'torch' ?
FAQ Summary.md	89	答：其实我也真的很想知道为什么会有这个问题……这个pytorch没装是什么情况？一般就俩情况，一个是真的没装，还有一个是装到其它环境了，当前激活的环境不是自己装的环境。**	A: Actually, I really want to know why this problem occurs... What is the situation when pytorch is not installed? Generally, there are two situations: one is that it is really not installed, and the other is that it is installed in another environment, and the currently activated environment is not the one you installed. **
FAQ Summary.md	90
FAQ Summary.md	91	**问：为什么提示说No module named 'tensorflow' ？	**Q: Why does it say No module named 'tensorflow'?
FAQ Summary.md	92	答：同上。**	Answer: Same as above. **
FAQ Summary.md	93
FAQ Summary.md	94	### g、cuda安装失败问题	### g. CUDA installation failure
FAQ Summary.md	95	一般cuda安装前需要安装Visual Studio，装个2017版本即可。	Generally, you need to install Visual Studio before installing CUDA, just install the 2017 version.
FAQ Summary.md	96
FAQ Summary.md	97	### h、Ubuntu系统问题	### h. Ubuntu system issues
FAQ Summary.md	98	**所有代码在Ubuntu下可以使用，我两个系统都试过。**	**All codes can be used under Ubuntu. I have tried both systems. **
FAQ Summary.md	99
FAQ Summary.md	100	### i、VSCODE提示错误的问题	### i. VSCODE prompts an error
FAQ Summary.md	101	**问：为什么在VSCODE里面提示一大堆的错误啊？	**Question: Why are there so many errors in VSCODE?
FAQ Summary.md	102	答：我也提示一大堆的错误，但是不影响，是VSCODE的问题，如果不想看错误的话就装Pycharm。	Answer: I also get a lot of errors, but it doesn’t matter. It’s a VSCODE problem. If you don’t want to see the errors, install Pycharm.
FAQ Summary.md	103	最好将设置里面的Python:Language Server，调整为Pylance。**	It is best to adjust the Python: Language Server in the settings to Pylance. **
FAQ Summary.md	104
FAQ Summary.md	105	### j、使用cpu进行训练与预测的问题	### j. Problems with using CPU for training and prediction
FAQ Summary.md	106	**对于keras和tf2的代码而言，如果想用cpu进行训练和预测，直接装cpu版本的tensorflow就可以了。**	**For keras and tf2 codes, if you want to use cpu for training and prediction, just install the cpu version of tensorflow. **
FAQ Summary.md	107
FAQ Summary.md	108	**对于pytorch的代码而言，如果想用cpu进行训练和预测，需要将cuda=True修改成cuda=False。**	**For pytorch code, if you want to use cpu for training and prediction, you need to change cuda=True to cuda=False. **
FAQ Summary.md	109
FAQ Summary.md	110	### k、tqdm没有pos参数问题	### k, tqdm has no pos parameter problem
FAQ Summary.md	111	**问：运行代码提示'tqdm' object has no attribute 'pos'。	**Q: When running the code, it prompts 'tqdm' object has no attribute 'pos'.
FAQ Summary.md	112	答：重装tqdm，换个版本就可以了。**	A: Just reinstall tqdm and change the version. **
FAQ Summary.md	113
FAQ Summary.md	114	### l、提示decode(“utf-8”)的问题	### l. Tips for decode("utf-8") issues
FAQ Summary.md	115	**由于h5py库的更新，安装过程中会自动安装h5py=3.0.0以上的版本，会导致decode("utf-8")的错误！	**Due to the update of h5py library, h5py=3.0.0 or higher version will be automatically installed during the installation process, which will cause decode("utf-8") error!
FAQ Summary.md	116	各位一定要在安装完tensorflow后利用命令装h5py=2.10.0！**	Everyone must use the command to install h5py=2.10.0 after installing tensorflow! **
FAQ Summary.md	117	```	```
FAQ Summary.md	118	pip install h5py==2.10.0	pip install h5py==2.10.0
FAQ Summary.md	119	```	```
FAQ Summary.md	120
FAQ Summary.md	121	### m、提示TypeError: __array__() takes 1 positional argument but 2 were given错误	### m. Tip: TypeError: __array__() takes 1 positional argument but 2 were given error
FAQ Summary.md	122	可以修改pillow版本解决。	This can be solved by modifying the pillow version.
FAQ Summary.md	123	```	```
FAQ Summary.md	124	pip install pillow==8.2.0	pip install pillow==8.2.0
FAQ Summary.md	125	```	```
FAQ Summary.md	126	### n、如何查看当前cuda和cudnn	### n. How to view the current cuda and cudnn
FAQ Summary.md	127	**window下cuda版本查看方式如下：	**The way to view the cuda version under window is as follows:
FAQ Summary.md	128	1、打开cmd窗口。	1. Open the cmd window.
FAQ Summary.md	129	2、输入nvcc -V。	2. Enter nvcc -V.
FAQ Summary.md	130	3、Cuda compilation tools, release XXXXXXXX中的XXXXXXXX即cuda版本。**	3. Cuda compilation tools, release XXXXXXXX where XXXXXXXX is the cuda version. **
FAQ Summary.md	131	![在这里插入图片描述](https://img-blog.csdnimg.cn/0389ea35107a408a80ab5cb6590d5a74.png?x-oss-process=image/watermark,type_d3F5LXplbmhlaQ,shadow_50,text_Q1NETiBAQnViYmxpaWlpbmc=,size_20,color_FFFFFF,t_70,g_se,x_16)	![Insert image description here](https://img-blog.csdnimg.cn/0389ea35107a408a80ab5cb6590d5a74.png?x-oss-process=image/watermark,type_d3F5LXplbmhlaQ,shadow_50,text_Q1NETiBAQnViYmxpaWlpbmc=,size_20,color_FFFFFF,t_70,g_se,x_16)
FAQ Summary.md	132	window下cudnn版本查看方式如下：	The way to view the cudnn version under window is as follows:
FAQ Summary.md	133	1、进入cuda安装目录，进入incude文件夹。	1. Enter the cuda installation directory and enter the incude folder.
FAQ Summary.md	134	2、找到cudnn.h文件。	2. Find the cudnn.h file.
FAQ Summary.md	135	3、右键文本打开，下拉，看到#define处可获得cudnn版本。	3. Right-click the text to open it, pull down, and see #define to get the cudnn version.
FAQ Summary.md	136	```python	```Python
FAQ Summary.md	137	#define CUDNN_MAJOR 7	#define CUDNN_MAJOR 7
FAQ Summary.md	138	#define CUDNN_MINOR 4	#define CUDNN_MINOR 4
FAQ Summary.md	139	#define CUDNN_PATCHLEVEL 1	#define CUDNN_PATCHLEVEL 1
FAQ Summary.md	140	```	```
FAQ Summary.md	141	代表cudnn为7.4.1。	Represents cudnn as 7.4.1.
FAQ Summary.md	142	![在这里插入图片描述](https://img-blog.csdnimg.cn/7a86b68b17c84feaa6fa95780d4ae4b4.png?x-oss-process=image/watermark,type_d3F5LXplbmhlaQ,shadow_50,text_Q1NETiBAQnViYmxpaWlpbmc=,size_20,color_FFFFFF,t_70,g_se,x_16)	![Insert image description here](https://img-blog.csdnimg.cn/7a86b68b17c84feaa6fa95780d4ae4b4.png?x-oss-process=image/watermark,type_d3F5LXplbmhlaQ,shadow_50,text_Q1NETiBAQnViYmxpaWlpbmc=,size_20,color_FFFFFF,t_70,g_se,x_16)
FAQ Summary.md	143	![在这里插入图片描述](https://img-blog.csdnimg.cn/81bb7c3e13cc492292530e4b69df86a9.png?x-oss-process=image/watermark,type_d3F5LXplbmhlaQ,shadow_50,text_Q1NETiBAQnViYmxpaWlpbmc=,size_20,color_FFFFFF,t_70,g_se,x_16)	![Insert image description here](https://img-blog.csdnimg.cn/81bb7c3e13cc492292530e4b69df86a9.png?x-oss-process=image/watermark,type_d3F5LXplbmhlaQ,shadow_50,text_Q1NETiBAQnViYmxpaWlpbmc=,size_20,color_FFFFFF,t_70,g_se,x_16)
FAQ Summary.md	144
FAQ Summary.md	145	### o、为什么按照你的环境配置后还是不能使用	### o. Why can't it be used after configuring according to your environment?
FAQ Summary.md	146	**问：up主，为什么我按照你的环境配置后还是不能使用？	**Question: Up Master, why can’t I use it after configuring it according to your environment?
FAQ Summary.md	147	答：请把你的GPU、CUDA、CUDNN、TF版本以及PYTORCH版本B站私聊告诉我。**	A: Please tell me your GPU, CUDA, CUDNN, TF version and PYTORCH version in private message on B site. **
FAQ Summary.md	148
FAQ Summary.md	149	### p、其它问题	### p. Other issues
FAQ Summary.md	150	**问：为什么提示TypeError: cat() got an unexpected keyword argument 'axis'，Traceback (most recent call last)，AttributeError: 'Tensor' object has no attribute 'bool'？	**Question: Why does it prompt TypeError: cat() got an unexpected keyword argument 'axis', Traceback (most recent call last), AttributeError: 'Tensor' object has no attribute 'bool'?
FAQ Summary.md	151	答：这是版本问题，建议使用torch1.2以上版本**	A: This is a version issue. It is recommended to use torch1.2 or above.
FAQ Summary.md	152
FAQ Summary.md	153	**其它有很多稀奇古怪的问题，很多是版本问题，建议按照我的视频教程安装Keras和tensorflow。比如装的是tensorflow2，就不用问我说为什么我没法运行Keras-yolo啥的。那是必然不行的。**	**There are many other strange problems, many of which are version issues. I suggest you follow my video tutorial to install Keras and tensorflow. For example, if you install tensorflow2, don't ask me why I can't run Keras-yolo or something. That will definitely not work. **
FAQ Summary.md	154
FAQ Summary.md	155	## 3、目标检测库问题汇总（人脸检测和分类库也可参考）	## 3. Summary of object detection library issues (face detection and classification libraries can also be used as reference)
FAQ Summary.md	156	### a、shape不匹配问题。	### a. Shape mismatch problem.
FAQ Summary.md	157	#### 1）、训练时shape不匹配问题。	#### 1) Shape mismatch problem during training.
FAQ Summary.md	158	**问：up主，为什么运行train.py会提示shape不匹配啊？	**Question: Upmaster, why does it prompt that shape does not match when running train.py?
FAQ Summary.md	159	答：在keras环境中，因为你训练的种类和原始的种类不同，网络结构会变化，所以最尾部的shape会有少量不匹配。**	A: In the Keras environment, because the type you are training is different from the original type, the network structure will change, so the shape of the last part will have a small mismatch. **
FAQ Summary.md	160
FAQ Summary.md	161	#### 2）、预测时shape不匹配问题。	#### 2) Shape mismatch problem during prediction.
FAQ Summary.md	162	**问：为什么我运行predict.py会提示我说shape不匹配呀。**	**Q: Why does it prompt me that the shape does not match when I run predict.py? **
FAQ Summary.md	163	##### i、copying a param with shape torch.Size([75, 704, 1, 1]) from checkpoint	##### i. copying a param with shape torch.Size([75, 704, 1, 1]) from checkpoint
FAQ Summary.md	164	在Pytorch里面是这样的：	In Pytorch, this is what it looks like:
FAQ Summary.md	165	![在这里插入图片描述](https://img-blog.csdnimg.cn/20200722171631901.png)	![Insert image description here](https://img-blog.csdnimg.cn/20200722171631901.png)
FAQ Summary.md	166	##### ii、Shapes are [1,1,1024,75] and [255,1024,1,1]. for 'Assign_360' (op: 'Assign') with input shapes: [1,1,1024,75], [255,1024,1,1].	##### ii. Shapes are [1,1,1024,75] and [255,1024,1,1]. for 'Assign_360' (op: 'Assign') with input shapes: [1,1,1024,75], [255,1024,1,1].
FAQ Summary.md	167	在Keras里面是这样的：	In Keras, this is what it looks like:
FAQ Summary.md	168	![在这里插入图片描述](https://img-blog.csdnimg.cn/20200722171523380.png?x-oss-process=image/watermark,type_ZmFuZ3poZW5naGVpdGk,shadow_10,text_aHR0cHM6Ly9ibG9nLmNzZG4ubmV0L3dlaXhpbl80NDc5MTk2NA==,size_16,color_FFFFFF,t_70)	![Insert image description here](https://img-blog.csdnimg.cn/20200722171523380.png?x-oss-process=image/watermark,type_ZmFuZ3poZW5naGVpdGk,shadow_10,text_aHR0cHM6Ly9ibG9nLmNzZG4ubmV0L3dlaXhpbl80NDc5MTk2NA==,size_16,color_FFFFFF,t_70)
FAQ Summary.md	169	**答：原因主要有仨：	**Answer: There are three main reasons:
FAQ Summary.md	170	1、训练的classes_path没改，就开始训练了。	1. The training classes_path was not changed, so the training started.
FAQ Summary.md	171	2、训练的model_path没改。	2. The model_path for training has not changed.
FAQ Summary.md	172	3、训练的classes_path没改。	3. The training classes_path has not been changed.
FAQ Summary.md	173	请检查清楚了！确定自己所用的model_path和classes_path是对应的！训练的时候用到的num_classes或者classes_path也需要检查！**	Please check carefully! Make sure the model_path and classes_path you use are corresponding! You also need to check the num_classes or classes_path used during training! **
FAQ Summary.md	174
FAQ Summary.md	175	### b、显存不足问题（OOM、RuntimeError: CUDA out of memory）。	### b. Insufficient video memory (OOM, RuntimeError: CUDA out of memory).
FAQ Summary.md	176	**问：为什么我运行train.py下面的命令行闪的贼快，还提示OOM啥的？	**Q: Why does the command line flash so quickly when I run train.py and prompt OOM or something?
FAQ Summary.md	177	答：这是在keras中出现的，爆显存了，可以改小batch_size，SSD的显存占用率是最小的，建议用SSD；	A: This happens in Keras. The video memory is full. You can reduce the batch_size. The video memory occupancy rate of SSD is the smallest. It is recommended to use SSD.
FAQ Summary.md	178	2G显存：SSD、YOLOV4-TINY	2G video memory: SSD, YOLOV4-TINY
FAQ Summary.md	179	4G显存：YOLOV3	4G video memory: YOLOV3
FAQ Summary.md	180	6G显存：YOLOV4、Retinanet、M2det、Efficientdet、Faster RCNN等	6G video memory: YOLOV4, Retinanet, M2det, Efficientdet, Faster RCNN, etc.
FAQ Summary.md	181	8G+显存：随便选吧。**	8G+ video memory: choose whatever you want. **
FAQ Summary.md	182	**需要注意的是，受到BatchNorm2d影响，batch_size不可为1，至少为2。**	**It should be noted that due to the influence of BatchNorm2d, batch_size cannot be 1 and must be at least 2. **
FAQ Summary.md	183
FAQ Summary.md	184	**问：为什么提示 RuntimeError: CUDA out of memory. Tried to allocate 52.00 MiB (GPU 0; 15.90 GiB total capacity; 14.85 GiB already allocated; 51.88 MiB free; 15.07 GiB reserved in total by PyTorch)？	**Question: Why is it prompted that RuntimeError: CUDA out of memory. Tried to allocate 52.00 MiB (GPU 0; 15.90 GiB total capacity; 14.85 GiB already allocated; 51.88 MiB free; 15.07 GiB reserved in total by PyTorch)?
FAQ Summary.md	185	答：这是pytorch中出现的，爆显存了，同上。**	A: This happens in pytorch, the video memory is full, same as above. **
FAQ Summary.md	186
FAQ Summary.md	187	**问：为什么我显存都没利用，就直接爆显存了？	**Question: Why did my video memory explode without me even using it?
FAQ Summary.md	188	答：都爆显存了，自然就不利用了，模型没有开始训练。**	A: The video memory is full, so it is not used and the model has not started training. **
FAQ Summary.md	189	### c、为什么要进行冻结训练与解冻训练，不进行行吗？	### c. Why do we need to conduct freeze training and thaw training? Is it okay not to conduct them?
FAQ Summary.md	190	**问：为什么要冻结训练和解冻训练呀？	**Q: Why do we need to freeze and unfreeze training?
FAQ Summary.md	191	答：可以不进行，本质上是为了保证性能不足的同学的训练，如果电脑性能完全不够，可以将Freeze_Epoch和UnFreeze_Epoch设置成一样，只进行冻结训练。**	A: You don't have to do it. It's essentially to ensure that students with insufficient performance can train. If the computer performance is completely insufficient, you can set Freeze_Epoch and UnFreeze_Epoch to the same and only perform frozen training. **
FAQ Summary.md	192
FAQ Summary.md	193	**同时这也是迁移学习的思想，因为神经网络主干特征提取部分所提取到的特征是通用的，我们冻结起来训练可以加快训练效率，也可以防止权值被破坏。**	**This is also the idea of transfer learning, because the features extracted by the feature extraction part of the neural network backbone are universal. We freeze the training to speed up the training efficiency and prevent the weights from being destroyed. **
FAQ Summary.md	194	在冻结阶段，模型的主干被冻结了，特征提取网络不发生改变。占用的显存较小，仅对网络进行微调。	In the freezing stage, the backbone of the model is frozen, and the feature extraction network does not change. The memory occupied is small, and only the network is fine-tuned.
FAQ Summary.md	195	在解冻阶段，模型的主干不被冻结了，特征提取网络会发生改变。占用的显存较大，网络所有的参数都会发生改变。	In the unfreezing stage, the backbone of the model is not frozen, and the feature extraction network will change. The video memory occupied is large, and all parameters of the network will change.
FAQ Summary.md	196
FAQ Summary.md	197	### d、我的LOSS好大啊，有问题吗？（我的LOSS好小啊，有问题吗？）	### d. My LOSS is so big, is there a problem? (My LOSS is so small, is there a problem?)
FAQ Summary.md	198	**问：为什么我的网络不收敛啊，LOSS是XXXX。	**Question: Why doesn’t my network converge? The LOSS is XXXX.
FAQ Summary.md	199	答：不同网络的LOSS不同，LOSS只是一个参考指标，用于查看网络是否收敛，而非评价网络好坏，我的yolo代码都没有归一化，所以LOSS值看起来比较高，LOSS的值不重要，重要的是是否在变小，预测是否有效果。**	A: The LOSS of different networks is different. LOSS is just a reference indicator to see whether the network has converged, not to evaluate the quality of the network. My yolo code is not normalized, so the LOSS value looks relatively high. The value of LOSS is not important. What is important is whether it is getting smaller and whether the prediction is effective. **
FAQ Summary.md	200
FAQ Summary.md	201	### e、为什么我训练出来的模型没有预测结果？	### e. Why does the model I trained not have any prediction results?
FAQ Summary.md	202	**问：为什么我的训练效果不好？预测了没有框（框不准）。	**Q: Why is my training effect not good? The prediction has no box (the box is not accurate).
FAQ Summary.md	203	答：**	answer:**
FAQ Summary.md	204	考虑几个问题：	Consider a few questions:
FAQ Summary.md	205	1、目标信息问题，查看2007_train.txt文件是否有目标信息，没有的话请修改voc_annotation.py。	1. Target information problem. Check whether the 2007_train.txt file contains target information. If not, please modify voc_annotation.py.
FAQ Summary.md	206	2、数据集问题，小于500的自行考虑增加数据集，同时测试不同的模型，确认数据集是好的。	2. Data set issue: If the data set is less than 500, consider increasing the data set and testing different models to confirm that the data set is good.
FAQ Summary.md	207	3、是否解冻训练，如果数据集分布与常规画面差距过大需要进一步解冻训练，调整主干，加强特征提取能力。	3. Whether to unfreeze the training. If the distribution of the data set is too different from the normal picture, further unfreeze the training, adjust the backbone, and enhance the feature extraction capability.
FAQ Summary.md	208	4、网络问题，比如SSD不适合小目标，因为先验框固定了。	4. Network problems, such as SSD is not suitable for small targets because the prior frame is fixed.
FAQ Summary.md	209	5、训练时长问题，有些同学只训练了几代表示没有效果，按默认参数训练完。	5. Regarding the training time, some students only trained for a few generations and found that there was no effect, so they completed the training with the default parameters.
FAQ Summary.md	210	6、确认自己是否按照步骤去做了，如果比如voc_annotation.py里面的classes是否修改了等。	6. Confirm whether you have followed the steps, for example, whether the classes in voc_annotation.py have been modified.
FAQ Summary.md	211	7、不同网络的LOSS不同，LOSS只是一个参考指标，用于查看网络是否收敛，而非评价网络好坏，LOSS的值不重要，重要的是是否收敛。	7. The LOSS of different networks is different. LOSS is only a reference indicator used to check whether the network has converged, rather than to evaluate the quality of the network. The value of LOSS is not important. What is important is whether it has converged.
FAQ Summary.md	212	8、是否修改了网络的主干，如果修改了没有预训练权重，网络不容易收敛，自然效果不好。	8. Has the backbone of the network been modified? If it is modified without pre-training weights, the network will not converge easily and the effect will naturally be poor.
FAQ Summary.md	213
FAQ Summary.md	214	### f、为什么我计算出来的map是0？	### f. Why is the map I calculated 0?
FAQ Summary.md	215	**问：为什么我的训练效果不好？没有map？	**Q: Why is my training effect not good? No map?
FAQ Summary.md	216	答：**	answer:**
FAQ Summary.md	217	首先尝试利用predict.py预测一下，如果有效果的话应该是get_map.py里面的classes_path设置错误。如果没有预测结果的话，解决方法同e问题，对下面几点进行检查：	First try to use predict.py to predict. If it works, it should be that the classes_path setting in get_map.py is wrong. If there is no prediction result, the solution is the same as problem e. Check the following points:
FAQ Summary.md	218	1、目标信息问题，查看2007_train.txt文件是否有目标信息，没有的话请修改voc_annotation.py。	1. Target information problem. Check whether the 2007_train.txt file contains target information. If not, please modify voc_annotation.py.
FAQ Summary.md	219	2、数据集问题，小于500的自行考虑增加数据集，同时测试不同的模型，确认数据集是好的。	2. Data set issue: If the data set is less than 500, consider increasing the data set and testing different models to confirm that the data set is good.
FAQ Summary.md	220	3、是否解冻训练，如果数据集分布与常规画面差距过大需要进一步解冻训练，调整主干，加强特征提取能力。	3. Whether to unfreeze the training. If the distribution of the data set is too different from the normal picture, further unfreeze the training, adjust the backbone, and enhance the feature extraction capability.
FAQ Summary.md	221	4、网络问题，比如SSD不适合小目标，因为先验框固定了。	4. Network problems, such as SSD is not suitable for small targets because the prior frame is fixed.
FAQ Summary.md	222	5、训练时长问题，有些同学只训练了几代表示没有效果，按默认参数训练完。	5. Regarding the training time, some students only trained for a few generations and found that there was no effect, so they completed the training with the default parameters.
FAQ Summary.md	223	6、确认自己是否按照步骤去做了，如果比如voc_annotation.py里面的classes是否修改了等。	6. Confirm whether you have followed the steps, for example, whether the classes in voc_annotation.py have been modified.
FAQ Summary.md	224	7、不同网络的LOSS不同，LOSS只是一个参考指标，用于查看网络是否收敛，而非评价网络好坏，LOSS的值不重要，重要的是是否收敛。	7. The LOSS of different networks is different. LOSS is only a reference indicator used to check whether the network has converged, rather than to evaluate the quality of the network. The value of LOSS is not important. What is important is whether it has converged.
FAQ Summary.md	225	8、是否修改了网络的主干，如果修改了没有预训练权重，网络不容易收敛，自然效果不好。	8. Has the backbone of the network been modified? If it is modified without pre-training weights, the network will not converge easily and the effect will naturally be poor.
FAQ Summary.md	226
FAQ Summary.md	227	### g、gbk编码错误（'gbk' codec can't decode byte）。	### g, gbk encoding error ('gbk' codec can't decode byte).
FAQ Summary.md	228	**问：我怎么出现了gbk什么的编码错误啊：**	**Q: Why did I get a gbk encoding error? **
FAQ Summary.md	229	```python	```Python
FAQ Summary.md	230	UnicodeDecodeError: 'gbk' codec can't decode byte 0xa6 in position 446: illegal multibyte sequence	UnicodeDecodeError: 'gbk' codec can't decode byte 0xa6 in position 446: illegal multibyte sequence
FAQ Summary.md	231	```	```
FAQ Summary.md	232	**答：标签和路径不要使用中文，如果一定要使用中文，请注意处理的时候编码的问题，改成打开文件的encoding方式改为utf-8。**	**Answer: Do not use Chinese characters in labels and paths. If you must use Chinese characters, please pay attention to the encoding problem when processing, and change the encoding method of opening the file to utf-8. **
FAQ Summary.md	233
FAQ Summary.md	234	### h、我的图片是xxx*xxx的分辨率的，可以用吗？	### h. My picture has a resolution of xxx*xxx. Can it be used?
FAQ Summary.md	235	**问：我的图片是xxx*xxx的分辨率的，可以用吗！**	**Q: My picture has a resolution of xxx*xxx, can it be used? **
FAQ Summary.md	236	**答：可以用，代码里面会自动进行resize与数据增强。**	**A: Yes, the code will automatically perform resizing and data enhancement. **
FAQ Summary.md	237
FAQ Summary.md	238	### i、我想进行数据增强！怎么增强？	### i. I want to perform data enhancement! How to enhance it?
FAQ Summary.md	239	**问：我想要进行数据增强！怎么做呢？**	**Q: I want to perform data augmentation! How can I do that? **
FAQ Summary.md	240	**答：可以用，代码里面会自动进行resize与数据增强。**	**A: Yes, the code will automatically perform resizing and data enhancement. **
FAQ Summary.md	241
FAQ Summary.md	242	### j、多GPU训练。	### j. Multi-GPU training.
FAQ Summary.md	243	**问：怎么进行多GPU训练？	**Q: How to perform multi-GPU training?
FAQ Summary.md	244	答：pytorch的大多数代码可以直接使用gpu训练，keras的话直接百度就好了，实现并不复杂，我没有多卡没法详细测试，还需要各位同学自己努力了。**	A: Most of the codes in pytorch can be trained directly using gpu. For keras, just search on Baidu. The implementation is not complicated. I don’t have a multi-card and cannot test it in detail. You still need to work hard on your own. **
FAQ Summary.md	245
FAQ Summary.md	246	### k、能不能训练灰度图？	### k. Can grayscale images be trained?
FAQ Summary.md	247	**问：能不能训练灰度图（预测灰度图）啊？	**Q: Can I train grayscale images (predict grayscale images)?
FAQ Summary.md	248	答：我的大多数库会将灰度图转化成RGB进行训练和预测，如果遇到代码不能训练或者预测灰度图的情况，可以尝试一下在get_random_data里面将Image.open后的结果转换成RGB，预测的时候也这样试试。（仅供参考）**	A: Most of my libraries will convert grayscale images into RGB for training and prediction. If you encounter a situation where the code cannot train or predict grayscale images, you can try to convert the result of Image.open into RGB in get_random_data, and try the same when predicting. (For reference only)**
FAQ Summary.md	249
FAQ Summary.md	250	### l、断点续练问题。	### l. The problem of resuming practice after a breakpoint.
FAQ Summary.md	251	**问：我已经训练过几个世代了，能不能从这个基础上继续开始训练	**Q: I have trained for several generations. Can I continue training from this basis?
FAQ Summary.md	252	答：可以，你在训练前，和载入预训练权重一样载入训练过的权重就行了。一般训练好的权重会保存在logs文件夹里面，将model_path修改成你要开始的权值的路径即可。**	A: Yes, before training, you can load the trained weights just like loading pre-trained weights. Generally, the trained weights will be saved in the logs folder. Just change the model_path to the path of the weights you want to start with. **
FAQ Summary.md	253
FAQ Summary.md	254	### m、我要训练其它的数据集，预训练权重能不能用？	### m. I want to train other data sets. Can I use the pre-trained weights?
FAQ Summary.md	255	**问：如果我要训练其它的数据集，预训练权重要怎么办啊？**	**Q: What if I want to train other datasets and the pre-training weights are important? **
FAQ Summary.md	256	**答：数据的预训练权重对不同数据集是通用的，因为特征是通用的，预训练权重对于99%的情况都必须要用，不用的话权值太过随机，特征提取效果不明显，网络训练的结果也不会好。**	**Answer: The pre-trained weights of data are universal for different data sets because the features are universal. Pre-trained weights must be used for 99% of cases. If not, the weights are too random, the feature extraction effect is not obvious, and the network training results will not be good. **
FAQ Summary.md	257
FAQ Summary.md	258	### n、网络如何从0开始训练？	### n. How to train the network from scratch?
FAQ Summary.md	259	**问：我要怎么不使用预训练权重啊？	**Q: How can I not use pre-trained weights?
FAQ Summary.md	260	答：看一看注释、大多数代码是model_path = ''，Freeze_Train = Fasle**，如果设置model_path无用，**那么把载入预训练权重的代码注释了就行。**	A: Take a look at the comments. Most of the codes are model_path = '', Freeze_Train = Fasle. If setting model_path is useless, then just comment out the code for loading pre-trained weights.
FAQ Summary.md	261
FAQ Summary.md	262	### o、为什么从0开始训练效果这么差（修改了网络主干，效果不好怎么办）？	### o. Why is the training effect so poor when starting from scratch (what should I do if the effect is not good after modifying the network backbone)?
FAQ Summary.md	263	**问：为什么我不使用预训练权重效果这么差啊？	**Q: Why is the effect so poor when I don’t use pre-trained weights?
FAQ Summary.md	264	答：因为随机初始化的权值不好，提取的特征不好，也就导致了模型训练的效果不好，voc07+12、coco+voc07+12效果都不一样，预训练权重还是非常重要的。**	A: Because the randomly initialized weights are not good, the extracted features are not good, which leads to poor model training results. The effects of voc07+12 and coco+voc07+12 are different. Pre-training weights are still very important. **
FAQ Summary.md	265
FAQ Summary.md	266	**问：up，我修改了网络，预训练权重还能用吗？	**Q: up, I modified the network, can the pre-trained weights still be used?
FAQ Summary.md	267	答：修改了主干的话，如果不是用的现有的网络，基本上预训练权重是不能用的，要么就自己判断权值里卷积核的shape然后自己匹配，要么只能自己预训练去了；修改了后半部分的话，前半部分的主干部分的预训练权重还是可以用的，如果是pytorch代码的话，需要自己修改一下载入权值的方式，判断shape后载入，如果是keras代码，直接by_name=True,skip_mismatch=True即可。**	A: If you modify the backbone, if you are not using an existing network, the pre-trained weights cannot be used. You can either judge the shape of the convolution kernel in the weights and match it yourself, or you can only pre-train yourself. If you modify the second half, the pre-trained weights of the backbone part of the first half can still be used. If it is pytorch code, you need to modify …
FAQ Summary.md	268	权值匹配的方式可以参考如下：	The weight matching method can be referred to as follows:
FAQ Summary.md	269	```python	```Python
FAQ Summary.md	270	# 加快模型训练的效率	# Speed up model training efficiency
FAQ Summary.md	271	print('Loading weights into state dict...')	print('Loading weights into state dict...')
FAQ Summary.md	272	device = torch.device('cuda' if torch.cuda.is_available() else 'cpu')	device = torch.device('cuda' if torch.cuda.is_available() else 'cpu')
FAQ Summary.md	273	model_dict = model.state_dict()	model_dict = model.state_dict()
FAQ Summary.md	274	pretrained_dict = torch.load(model_path, map_location=device)	pretrained_dict = torch.load(model_path, map_location=device)
FAQ Summary.md	275	a = {}	a = {}
FAQ Summary.md	276	for k, v in pretrained_dict.items():	for k, v in pretrained_dict.items():
FAQ Summary.md	277	try:	try:
FAQ Summary.md	278	if np.shape(model_dict[k]) == np.shape(v):	if np.shape(model_dict[k]) == np.shape(v):
FAQ Summary.md	279	a[k]=v	a[k]=v
FAQ Summary.md	280	except:	except:
FAQ Summary.md	281	pass	pass
FAQ Summary.md	282	model_dict.update(a)	model_dict.update(a)
FAQ Summary.md	283	model.load_state_dict(model_dict)	model.load_state_dict(model_dict)
FAQ Summary.md	284	print('Finished!')	print('Finished!')
FAQ Summary.md	285	```	```
FAQ Summary.md	286
FAQ Summary.md	287	**问：为什么从0开始训练效果这么差（我修改了网络主干，效果不好怎么办）？	**Q: Why is the training effect so poor when starting from scratch (I modified the network backbone, what should I do if the effect is not good)?
FAQ Summary.md	288	答：一般来讲，网络从0开始的训练效果会很差，因为权值太过随机，特征提取效果不明显，因此非常、非常、非常不建议大家从0开始训练！如果一定要从0开始，可以了解imagenet数据集，首先训练分类模型，获得网络的主干部分权值，分类模型的 主干部分 和该模型通用，基于此进行训练。	A: Generally speaking, the effect of training the network from scratch will be very poor, because the weights are too random and the feature extraction effect is not obvious. Therefore, it is highly, highly, highly recommended not to start training from scratch! If you must start from scratch, , you can understand the imagenet dataset. First, train the classification model to obtain the weights o…
FAQ Summary.md	289	网络修改了主干之后也是同样的问题，随机的权值效果很差。**	The same problem occurs after the network backbone is modified, and the random weights have a very poor effect. **
FAQ Summary.md	290
FAQ Summary.md	291	**问：怎么在模型上从0开始训练？	**Q: How to start training on the model from scratch?
FAQ Summary.md	292	答：在算力不足与调参能力不足的情况下从0开始训练毫无意义。模型特征提取能力在随机初始化参数的情况下非常差。没有好的参数调节能力和算力，无法使得网络正常收敛。**	A: It is meaningless to start training from scratch when computing power and parameter adjustment capabilities are insufficient. The model feature extraction capability is very poor when the parameters are randomly initialized. Without good parameter adjustment capabilities and computing power, the network cannot function properly. convergence.**
FAQ Summary.md	293	如果一定要从0开始，那么训练的时候请注意几点：	If you must start from 0, please pay attention to the following points when training:
FAQ Summary.md	294	- 不载入预训练权重。	- Do not load pre-trained weights.
FAQ Summary.md	295	- 不要进行冻结训练，注释冻结模型的代码。	- Do not freeze training, comment the code that freezes the model.
FAQ Summary.md	296
FAQ Summary.md	297	**问：为什么我不使用预训练权重效果这么差啊？	**Q: Why is the effect so poor when I don’t use pre-trained weights?
FAQ Summary.md	298	答：因为随机初始化的权值不好，提取的特征不好，也就导致了模型训练的效果不好，voc07+12、coco+voc07+12效果都不一样，预训练权重还是非常重要的。**	A: Because the randomly initialized weights are not good, the extracted features are not good, which leads to poor model training results. The effects of voc07+12 and coco+voc07+12 are different. Pre-training weights are still very important. **
FAQ Summary.md	299
FAQ Summary.md	300	### p、你的权值都是哪里来的？	### p. Where do your weights come from?
FAQ Summary.md	301	**问：如果网络不能从0开始训练的话你的权值哪里来的？	**Q: If the network cannot be trained from scratch, where do your weights come from?
FAQ Summary.md	302	答：有些权值是官方转换过来的，有些权值是自己训练出来的，我用到的主干的imagenet的权值都是官方的。**	A: Some weights are converted from official sources, and some are trained by myself. The weights of the main ImageNet I used are all official ones. **
FAQ Summary.md	303
FAQ Summary.md	304	### q、视频检测与摄像头检测	### q. Video detection and camera detection
FAQ Summary.md	305	**问：怎么用摄像头检测呀？	**Q: How to use the camera to detect?
FAQ Summary.md	306	答：predict.py修改参数可以进行摄像头检测，也有视频详细解释了摄像头检测的思路。**	A: You can modify the parameters of predict.py to perform camera detection. There is also a video that explains the idea of camera detection in detail. **
FAQ Summary.md	307
FAQ Summary.md	308	**问：怎么用视频检测呀？	**Q: How to use video detection?
FAQ Summary.md	309	答：同上**	Answer: Same as above**
FAQ Summary.md	310
FAQ Summary.md	311	### r、如何保存检测出的图片	### r. How to save the detected images
FAQ Summary.md	312	**问：检测完的图片怎么保存？	**Q: How to save the detected pictures?
FAQ Summary.md	313	答：一般目标检测用的是Image，所以查询一下PIL库的Image如何进行保存。详细看看predict.py文件的注释。**	A: Generally, target detection uses an Image, so check how to save the Image in the PIL library. Check the comments in the predict.py file for details.
FAQ Summary.md	314
FAQ Summary.md	315	**问：怎么用视频保存呀？	**Q: How do I save the video?
FAQ Summary.md	316	答：详细看看predict.py文件的注释。**	A: Please read the comments of predict.py file in detail.
FAQ Summary.md	317
FAQ Summary.md	318	### s、遍历问题	### s. Traversal Problem
FAQ Summary.md	319	**问：如何对一个文件夹的图片进行遍历？	**Q: How to traverse the images in a folder?
FAQ Summary.md	320	答：一般使用os.listdir先找出文件夹里面的所有图片，然后根据predict.py文件里面的执行思路检测图片就行了，详细看看predict.py文件的注释。**	A: Generally, you can use os.listdir to find all the images in the folder first, and then detect the images according to the execution ideas in the predict.py file. Please read the comments of the predict.py file for details.
FAQ Summary.md	321
FAQ Summary.md	322	**问：如何对一个文件夹的图片进行遍历？并且保存。	**Q: How to traverse the pictures in a folder and save them?
FAQ Summary.md	323	答：遍历的话一般使用os.listdir先找出文件夹里面的所有图片，然后根据predict.py文件里面的执行思路检测图片就行了。保存的话一般目标检测用的是Image，所以查询一下PIL库的Image如何进行保存。如果有些库用的是cv2，那就是查一下cv2怎么保存图片。详细看看predict.py文件的注释。**	A: For traversal, you can generally use os.listdir to find all the images in the folder, and then detect the images according to the execution ideas in the predict.py file. For saving, the target detection generally uses Image, so check how to save the Image of the PIL library. If some libraries use cv2, then check how to save images in cv2. Take a closer look at the comments of the predict.py fi…
FAQ Summary.md	324
FAQ Summary.md	325	### t、路径问题（No such file or directory、StopIteration: [Errno 13] Permission denied: 'XXXXXX'）	### t, path problem (No such file or directory, StopIteration: [Errno 13] Permission denied: 'XXXXXX')
FAQ Summary.md	326	**问：我怎么出现了这样的错误呀：**	**Q: Why did I get this error?**
FAQ Summary.md	327	```python	```Python
FAQ Summary.md	328	FileNotFoundError: 【Errno 2】 No such file or directory	FileNotFoundError: 【Errno 2】 No such file or directory
FAQ Summary.md	329	StopIteration: [Errno 13] Permission denied: 'D:\\Study\\Collection\\Dataset\\VOC07+12+test\\VOCdevkit/VOC2007'	StopIteration: [Errno 13] Permission denied: 'D:\\Study\\Collection\\Dataset\\VOC07+12+test\\VOCdevkit/VOC2007'
FAQ Summary.md	330	……………………………………	………………………………
FAQ Summary.md	331	……………………………………	………………………………
FAQ Summary.md	332	```	```
FAQ Summary.md	333	**答：去检查一下文件夹路径，查看是否有对应文件；并且检查一下2007_train.txt，其中文件路径是否有错。**	**Answer: Check the folder path to see if there is a corresponding file; and check 2007_train.txt to see if there is any error in the file path. **
FAQ Summary.md	334	关于路径有几个重要的点：	There are a few important points about the path:
FAQ Summary.md	335	**文件夹名称中一定不要有空格。	**There must not be spaces in the folder name.
FAQ Summary.md	336	注意相对路径和绝对路径。	Note the relative and absolute paths.
FAQ Summary.md	337	多百度路径相关的知识。**	More knowledge related to Baidu path. **
FAQ Summary.md	338
FAQ Summary.md	339	**所有的路径问题基本上都是根目录问题，好好查一下相对目录的概念！**	**All path problems are basically root directory problems. Check the concept of relative directories carefully! **
FAQ Summary.md	340	### u、和原版比较问题，你怎么和原版不一样啊？	### u. Compared with the original version, why are you different from the original?
FAQ Summary.md	341	**问：原版的代码是XXX，为什么你的代码是XXX？	**Q: The original code is XXX, why is your code XXX?
FAQ Summary.md	342	答：是啊……这要不怎么说我不是原版呢……**	A: Yes... That's why you say I'm not the original version... **
FAQ Summary.md	343
FAQ Summary.md	344	**问：你这个代码和原版比怎么样，可以达到原版的效果么？	**Q: How does your code compare to the original? Can it achieve the same effect as the original?
FAQ Summary.md	345	答：基本上可以达到，我都用voc数据测过，我没有好显卡，没有能力在coco上测试与训练。**	A: Basically, it can be achieved. I have tested it with VOC data. I don’t have a good graphics card and I don’t have the ability to test and train on Coco. **
FAQ Summary.md	346
FAQ Summary.md	347	**问：你有没有实现yolov4所有的tricks，和原版差距多少？	**Q: Have you implemented all the tricks of yolov4? How is the difference with the original version?
FAQ Summary.md	348	答：并没有实现全部的改进部分，由于YOLOV4使用的改进实在太多了，很难完全实现与列出来，这里只列出来了一些我比较感兴趣，而且非常有效的改进。论文中提到的SAM（注意力机制模块），作者自己的源码也没有使用。还有其它很多的tricks，不是所有的tricks都有提升，我也没法实现全部的tricks。至于和原版的比较，我没有能力训练coco数据集，根据使用过的同学反应差距不大。**	A: Not all improvements have been implemented. Since YOLOV4 uses so many improvements, it is difficult to fully implement and list them. Here are only some improvements that I am more interested in and are very effective. The SAM (attention mechanism module) mentioned in the paper is not used in the author's own source code. There are many other tricks, not all of which have been improved, and I …
FAQ Summary.md	349
FAQ Summary.md	350	### v、我的检测速度是xxx正常吗？我的检测速度还能增快吗？	### v. Is my detection speed xxx normal? Can my detection speed be increased?
FAQ Summary.md	351	**问：你这个FPS可以到达多少，可以到 XX FPS么？	**Q: What FPS can you reach? Can it reach XX FPS?
FAQ Summary.md	352	答：FPS和机子的配置有关，配置高就快，配置低就慢。**	A: FPS is related to the configuration of the machine. A high configuration means faster results, while a low configuration means slower results. **
FAQ Summary.md	353
FAQ Summary.md	354	**问：我的检测速度是xxx正常吗？我的检测速度还能增快吗？	**Q: Is my test speed xxx normal? Can my test speed be increased?
FAQ Summary.md	355	答：看配置，配置好速度就快，如果想要配置不变的情况下加快速度，就要修改网络了。**	A: It depends on the configuration. If the configuration is good, the speed will be fast. If you want to increase the speed without changing the configuration, you need to modify the network. **
FAQ Summary.md	356
FAQ Summary.md	357	**问：为什么我用服务器去测试yolov4（or others）的FPS只有十几？	**Q: Why is the FPS of yolov4 (or others) only in the 10s when I use the server to test it?
FAQ Summary.md	358	答：检查是否正确安装了tensorflow-gpu或者pytorch的gpu版本，如果已经正确安装，可以去利用time.time()的方法查看detect_image里面，哪一段代码耗时更长（不仅只有网络耗时长，其它处理部分也会耗时，如绘图等）。**	A: Check whether tensorflow-gpu or pytorch's gpu version is correctly installed. If it is correctly installed, you can use the time.time() method to check which part of the code in detect_image takes longer (not only the network, but also other processing parts, such as drawing, etc.). **
FAQ Summary.md	359
FAQ Summary.md	360	**问：为什么论文中说速度可以达到XX，但是这里却没有？	**Q: Why does the paper say the speed can reach XX, but it is not here?
FAQ Summary.md	361	答：检查是否正确安装了tensorflow-gpu或者pytorch的gpu版本，如果已经正确安装，可以去利用time.time()的方法查看detect_image里面，哪一段代码耗时更长（不仅只有网络耗时长，其它处理部分也会耗时，如绘图等）。有些论文还会使用多batch进行预测，我并没有去实现这个部分。**	A: Check whether tensorflow-gpu or pytorch's gpu version is correctly installed. If it is correctly installed, you can use the time.time() method to check which part of the code in detect_image takes longer (not only the network, but also other processing parts, such as drawing). Some papers also use multiple batches for prediction, but I did not implement this part. **
FAQ Summary.md	362
FAQ Summary.md	363	### w、预测图片不显示问题	### w. Problem of predicted image not being displayed
FAQ Summary.md	364	**问：为什么你的代码在预测完成后不显示图片？只是在命令行告诉我有什么目标。	**Q: Why doesn't your code show the image after the prediction is done? Just tell me what the target is in the command line.
FAQ Summary.md	365	答：给系统安装一个图片查看器就行了。**	A: Just install an image viewer on your system. **
FAQ Summary.md	366
FAQ Summary.md	367	### x、算法评价问题（目标检测的map、PR曲线、Recall、Precision等）	### x. Algorithm evaluation issues (map, PR curve, Recall, Precision, etc. of target detection)
FAQ Summary.md	368	**问：怎么计算map？	**Q: How to calculate map?
FAQ Summary.md	369	答：看map视频，都一个流程。**	A: Watch the map video, it's the same process. **
FAQ Summary.md	370
FAQ Summary.md	371	**问：计算map的时候，get_map.py里面有一个MINOVERLAP是什么用的，是iou吗？	**Q: When calculating the map, there is a MINOVERLAP in get_map.py. What is it used for? Is it iou?
FAQ Summary.md	372	答：是iou，它的作用是判断预测框和真实框的重合成度，如果重合程度大于MINOVERLAP，则预测正确。**	A: It is iou. Its function is to judge the degree of overlap between the predicted box and the true box. If the overlap is greater than MINOVERLAP, the prediction is correct. **
FAQ Summary.md	373
FAQ Summary.md	374	**问：为什么get_map.py里面的self.confidence（self.score）要设置的那么小？	**Q: Why is self.confidence (self.score) in get_map.py set so small?
FAQ Summary.md	375	答：看一下map的视频的原理部分，要知道所有的结果然后再进行pr曲线的绘制。**	A: Watch the principle part of the map video to know all the results and then draw the PR curve. **
FAQ Summary.md	376
FAQ Summary.md	377	**问：能不能说说怎么绘制PR曲线啥的呀。	**Q: Can you tell me how to draw a PR curve?
FAQ Summary.md	378	答：可以看mAP视频，结果里面有PR曲线。**	A: You can watch the mAP video, which contains the PR curve. **
FAQ Summary.md	379
FAQ Summary.md	380	**问：怎么计算Recall、Precision指标。	**Q: How to calculate Recall and Precision indicators.
FAQ Summary.md	381	答：这俩指标应该是相对于特定的置信度的，计算map的时候也会获得。**	A: These two indicators should be relative to a specific confidence level, which will also be obtained when calculating the map. **
FAQ Summary.md	382
FAQ Summary.md	383	### y、coco数据集训练问题	### y, coco dataset training problem
FAQ Summary.md	384	**问：目标检测怎么训练COCO数据集啊？。	**Q: How to train COCO dataset for object detection? .
FAQ Summary.md	385	答：coco数据训练所需要的txt文件可以参考qqwweee的yolo3的库，格式都是一样的。**	A: The txt files required for coco data training can refer to qqwweee's yolo3 library, the format is the same. **
FAQ Summary.md	386
FAQ Summary.md	387	### z、UP，怎么优化模型啊？我想提升效果	### z, UP, how to optimize the model? I want to improve the effect
FAQ Summary.md	388	**问：up，怎么修改模型啊，我想发个小论文！	**Question: Up, how do I modify the model? I want to publish a small paper!
FAQ Summary.md	389	答：建议看看yolov3和yolov4的区别，然后看看yolov4的论文，作为一个大型调参现场非常有参考意义，使用了很多tricks。我能给的建议就是多看一些经典模型，然后拆解里面的亮点结构并使用。**	A: I suggest you read the difference between yolov3 and yolov4, and then read the yolov4 paper. As a large-scale parameter adjustment site, it is very useful for reference and uses a lot of tricks. My advice is to read more classic models, disassemble the highlight structures in them and use them. **
FAQ Summary.md	390
FAQ Summary.md	391	### aa、UP，有Focal LOSS的代码吗？怎么改啊？	### aa, UP, is there a code for Focal LOSS? How to change it?
FAQ Summary.md	392	**问：up，YOLO系列使用Focal LOSS的代码你有吗，有提升吗？	**Q: Up, do you have the code for the YOLO series using Focal LOSS? Is there any improvement?
FAQ Summary.md	393	答：很多人试过，提升效果也不大（甚至变的更Low），它自己有自己的正负样本的平衡方式**。改代码的事情，还是自己好好看看代码吧。	A: Many people have tried it, but the improvement is not significant (it even becomes worse). It has its own way of balancing positive and negative samples**. As for changing the code, you should take a good look at the code yourself.
FAQ Summary.md	394
FAQ Summary.md	395	### ab、部署问题（ONNX、TensorRT等）	### ab, deployment issues (ONNX, TensorRT, etc.)
FAQ Summary.md	396	我没有具体部署到手机等设备上过，所以很多部署问题我并不了解……	I have never deployed it to a mobile phone or other device, so I don’t understand many deployment issues...
FAQ Summary.md	397
FAQ Summary.md	398	## 4、语义分割库问题汇总	## 4. Summary of semantic segmentation library issues
FAQ Summary.md	399	### a、shape不匹配问题	### a. Shape mismatch problem
FAQ Summary.md	400	#### 1）、训练时shape不匹配问题	#### 1) Shape mismatch during training
FAQ Summary.md	401	**问：up主，为什么运行train.py会提示shape不匹配啊？	**Question: Upmaster, why does it prompt that shape does not match when running train.py?
FAQ Summary.md	402	答：在keras环境中，因为你训练的种类和原始的种类不同，网络结构会变化，所以最尾部的shape会有少量不匹配。**	A: In the Keras environment, because the type you are training is different from the original type, the network structure will change, so the shape of the last part will have a small mismatch. **
FAQ Summary.md	403
FAQ Summary.md	404	#### 2）、预测时shape不匹配问题	#### 2) Shape mismatch problem during prediction
FAQ Summary.md	405	**问：为什么我运行predict.py会提示我说shape不匹配呀。**	**Q: Why does it prompt me that the shape does not match when I run predict.py? **
FAQ Summary.md	406	##### i、copying a param with shape torch.Size([75, 704, 1, 1]) from checkpoint	##### i. copying a param with shape torch.Size([75, 704, 1, 1]) from checkpoint
FAQ Summary.md	407	在Pytorch里面是这样的：	In Pytorch, this is what it looks like:
FAQ Summary.md	408	![在这里插入图片描述](https://img-blog.csdnimg.cn/20200722171631901.png)	![Insert image description here](https://img-blog.csdnimg.cn/20200722171631901.png)
FAQ Summary.md	409	##### ii、Shapes are [1,1,1024,75] and [255,1024,1,1]. for 'Assign_360' (op: 'Assign') with input shapes: [1,1,1024,75], [255,1024,1,1].	##### ii. Shapes are [1,1,1024,75] and [255,1024,1,1]. for 'Assign_360' (op: 'Assign') with input shapes: [1,1,1024,75], [255,1024,1,1].
FAQ Summary.md	410	在Keras里面是这样的：	In Keras, this is what it looks like:
FAQ Summary.md	411	![在这里插入图片描述](https://img-blog.csdnimg.cn/20200722171523380.png?x-oss-process=image/watermark,type_ZmFuZ3poZW5naGVpdGk,shadow_10,text_aHR0cHM6Ly9ibG9nLmNzZG4ubmV0L3dlaXhpbl80NDc5MTk2NA==,size_16,color_FFFFFF,t_70)	![Insert image description here](https://img-blog.csdnimg.cn/20200722171523380.png?x-oss-process=image/watermark,type_ZmFuZ3poZW5naGVpdGk,shadow_10,text_aHR0cHM6Ly9ibG9nLmNzZG4ubmV0L3dlaXhpbl80NDc5MTk2NA==,size_16,color_FFFFFF,t_70)
FAQ Summary.md	412	**答：原因主要有二：	**Answer: There are two main reasons:
FAQ Summary.md	413	1、train.py里面的num_classes没改。	1. The num_classes in train.py has not been changed.
FAQ Summary.md	414	2、预测时num_classes没改。	2. num_classes was not changed during prediction.
FAQ Summary.md	415	3、预测时model_path没改。	3. model_path was not changed during prediction.
FAQ Summary.md	416	请检查清楚！训练和预测的时候用到的num_classes都需要检查！**	Please check carefully! You need to check the num_classes used in training and prediction! **
FAQ Summary.md	417
FAQ Summary.md	418	### b、显存不足问题（OOM、RuntimeError: CUDA out of memory）。	### b. Insufficient video memory (OOM, RuntimeError: CUDA out of memory).
FAQ Summary.md	419	**问：为什么我运行train.py下面的命令行闪的贼快，还提示OOM啥的？	**Q: Why does the command line flash so quickly when I run train.py and prompt OOM or something?
FAQ Summary.md	420	答：这是在keras中出现的，爆显存了，可以改小batch_size。**	A: This happens in keras. The video memory is full. You can reduce the batch_size. **
FAQ Summary.md	421
FAQ Summary.md	422	**需要注意的是，受到BatchNorm2d影响，batch_size不可为1，至少为2。**	**It should be noted that due to the influence of BatchNorm2d, batch_size cannot be 1 and must be at least 2. **
FAQ Summary.md	423
FAQ Summary.md	424	**问：为什么提示 RuntimeError: CUDA out of memory. Tried to allocate 52.00 MiB (GPU 0; 15.90 GiB total capacity; 14.85 GiB already allocated; 51.88 MiB free; 15.07 GiB reserved in total by PyTorch)？	**Question: Why is it prompted that RuntimeError: CUDA out of memory. Tried to allocate 52.00 MiB (GPU 0; 15.90 GiB total capacity; 14.85 GiB already allocated; 51.88 MiB free; 15.07 GiB reserved in total by PyTorch)?
FAQ Summary.md	425	答：这是pytorch中出现的，爆显存了，同上。**	A: This happens in pytorch, the video memory is full, same as above. **
FAQ Summary.md	426
FAQ Summary.md	427	**问：为什么我显存都没利用，就直接爆显存了？	**Question: Why did my video memory explode without me even using it?
FAQ Summary.md	428	答：都爆显存了，自然就不利用了，模型没有开始训练。**	A: The video memory is full, so it is not used and the model has not started training. **
FAQ Summary.md	429
FAQ Summary.md	430	### c、为什么要进行冻结训练与解冻训练，不进行行吗？	### c. Why do we need to conduct freeze training and thaw training? Is it okay not to conduct them?
FAQ Summary.md	431	**问：为什么要冻结训练和解冻训练呀？	**Q: Why do we need to freeze and unfreeze training?
FAQ Summary.md	432	答：可以不进行，本质上是为了保证性能不足的同学的训练，如果电脑性能完全不够，可以将Freeze_Epoch和UnFreeze_Epoch设置成一样，只进行冻结训练。**	A: You don't have to do it. It's essentially to ensure that students with insufficient performance can train. If the computer performance is completely insufficient, you can set Freeze_Epoch and UnFreeze_Epoch to the same and only perform frozen training. **
FAQ Summary.md	433
FAQ Summary.md	434	**同时这也是迁移学习的思想，因为神经网络主干特征提取部分所提取到的特征是通用的，我们冻结起来训练可以加快训练效率，也可以防止权值被破坏。**	**This is also the idea of transfer learning, because the features extracted by the feature extraction part of the neural network backbone are universal. We freeze the training to speed up the training efficiency and prevent the weights from being destroyed. **
FAQ Summary.md	435	在冻结阶段，模型的主干被冻结了，特征提取网络不发生改变。占用的显存较小，仅对网络进行微调。	In the freezing stage, the backbone of the model is frozen, and the feature extraction network does not change. The memory occupied is small, and only the network is fine-tuned.
FAQ Summary.md	436	在解冻阶段，模型的主干不被冻结了，特征提取网络会发生改变。占用的显存较大，网络所有的参数都会发生改变。	In the unfreezing stage, the backbone of the model is not frozen, and the feature extraction network will change. The video memory occupied is large, and all parameters of the network will change.
FAQ Summary.md	437
FAQ Summary.md	438	### d、我的LOSS好大啊，有问题吗？（我的LOSS好小啊，有问题吗？）	### d. My LOSS is so big, is there a problem? (My LOSS is so small, is there a problem?)
FAQ Summary.md	439	**问：为什么我的网络不收敛啊，LOSS是XXXX。	**Question: Why doesn’t my network converge? The LOSS is XXXX.
FAQ Summary.md	440	答：不同网络的LOSS不同，LOSS只是一个参考指标，用于查看网络是否收敛，而非评价网络好坏，我的yolo代码都没有归一化，所以LOSS值看起来比较高，LOSS的值不重要，重要的是是否在变小，预测是否有效果。**	A: The LOSS of different networks is different. LOSS is just a reference indicator to see whether the network has converged, not to evaluate the quality of the network. My yolo code is not normalized, so the LOSS value looks relatively high. The value of LOSS is not important. What is important is whether it is getting smaller and whether the prediction is effective. **
FAQ Summary.md	441
FAQ Summary.md	442	### e、为什么我训练出来的模型没有预测结果？	### e. Why does the model I trained not have any prediction results?
FAQ Summary.md	443	**问：为什么我的训练效果不好？预测了没有框（框不准）。	**Q: Why is my training effect not good? The prediction has no box (the box is not accurate).
FAQ Summary.md	444	答：**	answer:**
FAQ Summary.md	445	**考虑几个问题：	** Consider a few questions:
FAQ Summary.md	446	1、数据集问题，这是最重要的问题。小于500的自行考虑增加数据集；一定要检查数据集的标签，视频中详细解析了VOC数据集的格式，但并不是有输入图片有输出标签即可，还需要确认标签的每一个像素值是否为它对应的种类。很多同学的标签格式不对，最常见的错误格式就是标签的背景为黑，目标为白，此时目标的像素点值为255，无法正常训练，目标需要为1才行。	1. Dataset issue, this is the most important issue. If the number of data is less than 500, consider adding more data sets; be sure to check the labels of the data sets. The video explains the format of the VOC data set in detail, but it is not enough to have input images and output labels. You also need to confirm whether each pixel value of the label is the corresponding type. Many students' la…
FAQ Summary.md	447	2、是否解冻训练，如果数据集分布与常规画面差距过大需要进一步解冻训练，调整主干，加强特征提取能力。	2. Whether to unfreeze the training. If the distribution of the data set is too different from the normal picture, further unfreeze the training, adjust the backbone, and enhance the feature extraction capability.
FAQ Summary.md	448	3、网络问题，可以尝试不同的网络。	3. If it is a network problem, you can try a different network.
FAQ Summary.md	449	4、训练时长问题，有些同学只训练了几代表示没有效果，按默认参数训练完。	4. Regarding the training time, some students only trained for a few generations and found that there was no effect, so they completed the training with the default parameters.
FAQ Summary.md	450	5、确认自己是否按照步骤去做了。	5. Confirm whether you have followed the steps.
FAQ Summary.md	451	6、不同网络的LOSS不同，LOSS只是一个参考指标，用于查看网络是否收敛，而非评价网络好坏，LOSS的值不重要，重要的是是否收敛。**	6. Different networks have different LOSS. LOSS is just a reference indicator to see whether the network has converged, not to evaluate the quality of the network. The value of LOSS is not important, what is important is whether it has converged. **
FAQ Summary.md	452
FAQ Summary.md	453	**问：为什么我的训练效果不好？对小目标预测不准确。	**Q: Why is my training effect not good? The prediction of small targets is not accurate.
FAQ Summary.md	454	答：对于deeplab和pspnet而言，可以修改一下downsample_factor，当downsample_factor为16的时候下采样倍数过多，效果不太好，可以修改为8。**	A: For deeplab and pspnet, you can modify the downsample_factor. When the downsample_factor is 16, the downsampling factor is too much and the effect is not very good. You can change it to 8. **
FAQ Summary.md	455
FAQ Summary.md	456	### f、为什么我计算出来的miou是0？	### f. Why is the miou I calculated 0?
FAQ Summary.md	457	**问：为什么我的训练效果不好？计算出来的miou是0？。**	**Q: Why is my training effect not good? The calculated miou is 0? **
FAQ Summary.md	458	答：	answer:
FAQ Summary.md	459	与e类似，**考虑几个问题：	Similar to e, **consider several issues:
FAQ Summary.md	460	1、数据集问题，这是最重要的问题。小于500的自行考虑增加数据集；一定要检查数据集的标签，视频中详细解析了VOC数据集的格式，但并不是有输入图片有输出标签即可，还需要确认标签的每一个像素值是否为它对应的种类。很多同学的标签格式不对，最常见的错误格式就是标签的背景为黑，目标为白，此时目标的像素点值为255，无法正常训练，目标需要为1才行。	1. Dataset issue, this is the most important issue. If the number of data is less than 500, consider adding more data sets; be sure to check the labels of the data sets. The video explains the format of the VOC data set in detail, but it is not enough to have input images and output labels. You also need to confirm whether each pixel value of the label is the corresponding type. Many students' la…
FAQ Summary.md	461	2、是否解冻训练，如果数据集分布与常规画面差距过大需要进一步解冻训练，调整主干，加强特征提取能力。	2. Whether to unfreeze the training. If the distribution of the data set is too different from the normal picture, further unfreeze the training, adjust the backbone, and enhance the feature extraction capability.
FAQ Summary.md	462	3、网络问题，可以尝试不同的网络。	3. If it is a network problem, you can try a different network.
FAQ Summary.md	463	4、训练时长问题，有些同学只训练了几代表示没有效果，按默认参数训练完。	4. Regarding the training time, some students only trained for a few generations and found that there was no effect, so they completed the training with the default parameters.
FAQ Summary.md	464	5、确认自己是否按照步骤去做了。	5. Confirm whether you have followed the steps.
FAQ Summary.md	465	6、不同网络的LOSS不同，LOSS只是一个参考指标，用于查看网络是否收敛，而非评价网络好坏，LOSS的值不重要，重要的是是否收敛。**	6. Different networks have different LOSS. LOSS is just a reference indicator to see whether the network has converged, not to evaluate the quality of the network. The value of LOSS is not important, what is important is whether it has converged. **
FAQ Summary.md	466
FAQ Summary.md	467	### g、gbk编码错误（'gbk' codec can't decode byte）。	### g, gbk encoding error ('gbk' codec can't decode byte).
FAQ Summary.md	468	**问：我怎么出现了gbk什么的编码错误啊：**	**Q: Why did I get a gbk encoding error? **
FAQ Summary.md	469	```python	```Python
FAQ Summary.md	470	UnicodeDecodeError: 'gbk' codec can't decode byte 0xa6 in position 446: illegal multibyte sequence	UnicodeDecodeError: 'gbk' codec can't decode byte 0xa6 in position 446: illegal multibyte sequence
FAQ Summary.md	471	```	```
FAQ Summary.md	472	**答：标签和路径不要使用中文，如果一定要使用中文，请注意处理的时候编码的问题，改成打开文件的encoding方式改为utf-8。**	**Answer: Do not use Chinese characters in labels and paths. If you must use Chinese characters, please pay attention to the encoding problem when processing, and change the encoding method of opening the file to utf-8. **
FAQ Summary.md	473
FAQ Summary.md	474	### h、我的图片是xxx*xxx的分辨率的，可以用吗？	### h. My picture has a resolution of xxx*xxx. Can it be used?
FAQ Summary.md	475	**问：我的图片是xxx*xxx的分辨率的，可以用吗！**	**Q: My picture has a resolution of xxx*xxx, can it be used? **
FAQ Summary.md	476	**答：可以用，代码里面会自动进行resize与数据增强。**	**A: Yes, the code will automatically perform resizing and data enhancement. **
FAQ Summary.md	477
FAQ Summary.md	478	### i、我想进行数据增强！怎么增强？	### i. I want to perform data enhancement! How to enhance it?
FAQ Summary.md	479	**问：我想要进行数据增强！怎么做呢？**	**Q: I want to perform data augmentation! How can I do that? **
FAQ Summary.md	480	**答：可以用，代码里面会自动进行resize与数据增强。**	**A: Yes, the code will automatically perform resizing and data enhancement. **
FAQ Summary.md	481
FAQ Summary.md	482	### j、多GPU训练。	### j. Multi-GPU training.
FAQ Summary.md	483	**问：怎么进行多GPU训练？	**Q: How to perform multi-GPU training?
FAQ Summary.md	484	答：pytorch的大多数代码可以直接使用gpu训练，keras的话直接百度就好了，实现并不复杂，我没有多卡没法详细测试，还需要各位同学自己努力了。**	A: Most of the codes in pytorch can be trained directly using gpu. For keras, just search on Baidu. The implementation is not complicated. I don’t have a multi-card and cannot test it in detail. You still need to work hard on your own. **
FAQ Summary.md	485
FAQ Summary.md	486	### k、能不能训练灰度图？	### k. Can grayscale images be trained?
FAQ Summary.md	487	**问：能不能训练灰度图（预测灰度图）啊？	**Q: Can I train grayscale images (predict grayscale images)?
FAQ Summary.md	488	答：我的大多数库会将灰度图转化成RGB进行训练和预测，如果遇到代码不能训练或者预测灰度图的情况，可以尝试一下在get_random_data里面将Image.open后的结果转换成RGB，预测的时候也这样试试。（仅供参考）**	A: Most of my libraries will convert grayscale images into RGB for training and prediction. If you encounter a situation where the code cannot train or predict grayscale images, you can try to convert the result of Image.open into RGB in get_random_data, and try the same when predicting. (For reference only)**
FAQ Summary.md	489
FAQ Summary.md	490	### l、断点续练问题。	### l. The problem of resuming practice after a breakpoint.
FAQ Summary.md	491	**问：我已经训练过几个世代了，能不能从这个基础上继续开始训练	**Q: I have trained for several generations. Can I continue training from this basis?
FAQ Summary.md	492	答：可以，你在训练前，和载入预训练权重一样载入训练过的权重就行了。一般训练好的权重会保存在logs文件夹里面，将model_path修改成你要开始的权值的路径即可。**	A: Yes, before training, you can load the trained weights just like loading pre-trained weights. Generally, the trained weights will be saved in the logs folder. Just change the model_path to the path of the weights you want to start with. **
FAQ Summary.md	493
FAQ Summary.md	494	### m、我要训练其它的数据集，预训练权重能不能用？	### m. I want to train other data sets. Can I use the pre-trained weights?
FAQ Summary.md	495	**问：如果我要训练其它的数据集，预训练权重要怎么办啊？**	**Q: What if I want to train other datasets and the pre-training weights are important? **
FAQ Summary.md	496	**答：数据的预训练权重对不同数据集是通用的，因为特征是通用的，预训练权重对于99%的情况都必须要用，不用的话权值太过随机，特征提取效果不明显，网络训练的结果也不会好。**	**Answer: The pre-trained weights of data are universal for different data sets because the features are universal. Pre-trained weights must be used for 99% of cases. If not, the weights are too random, the feature extraction effect is not obvious, and the network training results will not be good. **
FAQ Summary.md	497
FAQ Summary.md	498	### n、网络如何从0开始训练？	### n. How to train the network from scratch?
FAQ Summary.md	499	**问：我要怎么不使用预训练权重啊？	**Q: How can I not use pre-trained weights?
FAQ Summary.md	500	答：看一看注释、大多数代码是model_path = ''，Freeze_Train = Fasle**，如果设置model_path无用，**那么把载入预训练权重的代码注释了就行。**	A: Take a look at the comments. Most of the codes are model_path = '', Freeze_Train = Fasle. If setting model_path is useless, then just comment out the code for loading pre-trained weights.
FAQ Summary.md	501
FAQ Summary.md	502	### o、为什么从0开始训练效果这么差（修改了网络主干，效果不好怎么办）？	### o. Why is the training effect so poor when starting from scratch (what should I do if the effect is not good after modifying the network backbone)?
FAQ Summary.md	503	**问：为什么我不使用预训练权重效果这么差啊？	**Q: Why is the effect so poor when I don’t use pre-trained weights?
FAQ Summary.md	504	答：因为随机初始化的权值不好，提取的特征不好，也就导致了模型训练的效果不好，预训练权重还是非常重要的。**	A: Because the randomly initialized weights are not good, the extracted features are not good, which leads to poor model training results. Pre-training weights are still very important. **
FAQ Summary.md	505
FAQ Summary.md	506	**问：up，我修改了网络，预训练权重还能用吗？	**Q: up, I modified the network, can the pre-trained weights still be used?
FAQ Summary.md	507	答：修改了主干的话，如果不是用的现有的网络，基本上预训练权重是不能用的，要么就自己判断权值里卷积核的shape然后自己匹配，要么只能自己预训练去了；修改了后半部分的话，前半部分的主干部分的预训练权重还是可以用的，如果是pytorch代码的话，需要自己修改一下载入权值的方式，判断shape后载入，如果是keras代码，直接by_name=True,skip_mismatch=True即可。**	A: If you modify the backbone, if you are not using an existing network, the pre-trained weights cannot be used. You can either judge the shape of the convolution kernel in the weights and match it yourself, or you can only pre-train yourself. If you modify the second half, the pre-trained weights of the backbone part of the first half can still be used. If it is pytorch code, you need to modify …
FAQ Summary.md	508	权值匹配的方式可以参考如下：	The weight matching method can be referred to as follows:
FAQ Summary.md	509	```python	```Python
FAQ Summary.md	510	# 加快模型训练的效率	# Speed up model training efficiency
FAQ Summary.md	511	print('Loading weights into state dict...')	print('Loading weights into state dict...')
FAQ Summary.md	512	device = torch.device('cuda' if torch.cuda.is_available() else 'cpu')	device = torch.device('cuda' if torch.cuda.is_available() else 'cpu')
FAQ Summary.md	513	model_dict = model.state_dict()	model_dict = model.state_dict()
FAQ Summary.md	514	pretrained_dict = torch.load(model_path, map_location=device)	pretrained_dict = torch.load(model_path, map_location=device)
FAQ Summary.md	515	a = {}	a = {}
FAQ Summary.md	516	for k, v in pretrained_dict.items():	for k, v in pretrained_dict.items():
FAQ Summary.md	517	try:	try:
FAQ Summary.md	518	if np.shape(model_dict[k]) == np.shape(v):	if np.shape(model_dict[k]) == np.shape(v):
FAQ Summary.md	519	a[k]=v	a[k]=v
FAQ Summary.md	520	except:	except:
FAQ Summary.md	521	pass	pass
FAQ Summary.md	522	model_dict.update(a)	model_dict.update(a)
FAQ Summary.md	523	model.load_state_dict(model_dict)	model.load_state_dict(model_dict)
FAQ Summary.md	524	print('Finished!')	print('Finished!')
FAQ Summary.md	525	```	```
FAQ Summary.md	526
FAQ Summary.md	527	**问：为什么从0开始训练效果这么差（我修改了网络主干，效果不好怎么办）？	**Q: Why is the training effect so poor when starting from scratch (I modified the network backbone, what should I do if the effect is not good)?
FAQ Summary.md	528	答：一般来讲，网络从0开始的训练效果会很差，因为权值太过随机，特征提取效果不明显，因此非常、非常、非常不建议大家从0开始训练！如果一定要从0开始，可以了解imagenet数据集，首先训练分类模型，获得网络的主干部分权值，分类模型的 主干部分 和该模型通用，基于此进行训练。	A: Generally speaking, the effect of training the network from scratch will be very poor, because the weights are too random and the feature extraction effect is not obvious. Therefore, it is highly, highly, highly recommended not to start training from scratch! If you must start from scratch, , you can understand the imagenet dataset. First, train the classification model to obtain the weights o…
FAQ Summary.md	529	网络修改了主干之后也是同样的问题，随机的权值效果很差。**	The same problem occurs after the network backbone is modified, and the random weights have a very poor effect. **
FAQ Summary.md	530
FAQ Summary.md	531	**问：怎么在模型上从0开始训练？	**Q: How to start training on the model from scratch?
FAQ Summary.md	532	答：在算力不足与调参能力不足的情况下从0开始训练毫无意义。模型特征提取能力在随机初始化参数的情况下非常差。没有好的参数调节能力和算力，无法使得网络正常收敛。**	A: It is meaningless to start training from scratch when computing power and parameter adjustment capabilities are insufficient. The model feature extraction capability is very poor when the parameters are randomly initialized. Without good parameter adjustment capabilities and computing power, the network cannot function properly. convergence.**
FAQ Summary.md	533	如果一定要从0开始，那么训练的时候请注意几点：	If you must start from 0, please pay attention to the following points when training:
FAQ Summary.md	534	- 不载入预训练权重。	- Do not load pre-trained weights.
FAQ Summary.md	535	- 不要进行冻结训练，注释冻结模型的代码。	- Do not freeze training, comment the code that freezes the model.
FAQ Summary.md	536
FAQ Summary.md	537	**问：为什么我不使用预训练权重效果这么差啊？	**Q: Why is the effect so poor when I don’t use pre-trained weights?
FAQ Summary.md	538	答：因为随机初始化的权值不好，提取的特征不好，也就导致了模型训练的效果不好，voc07+12、coco+voc07+12效果都不一样，预训练权重还是非常重要的。**	A: Because the randomly initialized weights are not good, the extracted features are not good, which leads to poor model training results. The effects of voc07+12 and coco+voc07+12 are different. Pre-training weights are still very important. **
FAQ Summary.md	539
FAQ Summary.md	540	### p、你的权值都是哪里来的？	### p. Where do your weights come from?
FAQ Summary.md	541	**问：如果网络不能从0开始训练的话你的权值哪里来的？	**Q: If the network cannot be trained from scratch, where do your weights come from?
FAQ Summary.md	542	答：有些权值是官方转换过来的，有些权值是自己训练出来的，我用到的主干的imagenet的权值都是官方的。**	A: Some weights are converted from official sources, and some are trained by myself. The weights of the main ImageNet I used are all official ones. **
FAQ Summary.md	543
FAQ Summary.md	544
FAQ Summary.md	545	### q、视频检测与摄像头检测	### q. Video detection and camera detection
FAQ Summary.md	546	**问：怎么用摄像头检测呀？	**Q: How to use the camera to detect?
FAQ Summary.md	547	答：predict.py修改参数可以进行摄像头检测，也有视频详细解释了摄像头检测的思路。**	A: You can modify the parameters of predict.py to perform camera detection. There is also a video that explains the idea of camera detection in detail. **
FAQ Summary.md	548
FAQ Summary.md	549	**问：怎么用视频检测呀？	**Q: How to use video detection?
FAQ Summary.md	550	答：同上**	Answer: Same as above**
FAQ Summary.md	551
FAQ Summary.md	552	### r、如何保存检测出的图片	### r. How to save the detected images
FAQ Summary.md	553	**问：检测完的图片怎么保存？	**Q: How to save the detected pictures?
FAQ Summary.md	554	答：一般目标检测用的是Image，所以查询一下PIL库的Image如何进行保存。详细看看predict.py文件的注释。**	A: Generally, target detection uses an Image, so check how to save the Image in the PIL library. Check the comments in the predict.py file for details.
FAQ Summary.md	555
FAQ Summary.md	556	**问：怎么用视频保存呀？	**Q: How do I save the video?
FAQ Summary.md	557	答：详细看看predict.py文件的注释。**	A: Please read the comments of predict.py file in detail.
FAQ Summary.md	558
FAQ Summary.md	559	### s、遍历问题	### s. Traversal Problem
FAQ Summary.md	560	**问：如何对一个文件夹的图片进行遍历？	**Q: How to traverse the images in a folder?
FAQ Summary.md	561	答：一般使用os.listdir先找出文件夹里面的所有图片，然后根据predict.py文件里面的执行思路检测图片就行了，详细看看predict.py文件的注释。**	A: Generally, you can use os.listdir to find all the images in the folder first, and then detect the images according to the execution ideas in the predict.py file. Please read the comments of the predict.py file for details.
FAQ Summary.md	562
FAQ Summary.md	563	**问：如何对一个文件夹的图片进行遍历？并且保存。	**Q: How to traverse the pictures in a folder and save them?
FAQ Summary.md	564	答：遍历的话一般使用os.listdir先找出文件夹里面的所有图片，然后根据predict.py文件里面的执行思路检测图片就行了。保存的话一般目标检测用的是Image，所以查询一下PIL库的Image如何进行保存。如果有些库用的是cv2，那就是查一下cv2怎么保存图片。详细看看predict.py文件的注释。**	A: For traversal, you can generally use os.listdir to find all the images in the folder, and then detect the images according to the execution ideas in the predict.py file. For saving, the target detection generally uses Image, so check how to save the Image of the PIL library. If some libraries use cv2, then check how to save images in cv2. Take a closer look at the comments of the predict.py fi…
FAQ Summary.md	565
FAQ Summary.md	566	### t、路径问题（No such file or directory、StopIteration: [Errno 13] Permission denied: 'XXXXXX'）	### t, path problem (No such file or directory, StopIteration: [Errno 13] Permission denied: 'XXXXXX')
FAQ Summary.md	567	**问：我怎么出现了这样的错误呀：**	**Q: Why did I get this error?**
FAQ Summary.md	568	```python	```Python
FAQ Summary.md	569	FileNotFoundError: 【Errno 2】 No such file or directory	FileNotFoundError: 【Errno 2】 No such file or directory
FAQ Summary.md	570	StopIteration: [Errno 13] Permission denied: 'D:\\Study\\Collection\\Dataset\\VOC07+12+test\\VOCdevkit/VOC2007'	StopIteration: [Errno 13] Permission denied: 'D:\\Study\\Collection\\Dataset\\VOC07+12+test\\VOCdevkit/VOC2007'
FAQ Summary.md	571	……………………………………	………………………………
FAQ Summary.md	572	……………………………………	………………………………
FAQ Summary.md	573	```	```
FAQ Summary.md	574	**答：去检查一下文件夹路径，查看是否有对应文件；并且检查一下2007_train.txt，其中文件路径是否有错。**	**Answer: Check the folder path to see if there is a corresponding file; and check 2007_train.txt to see if there is any error in the file path. **
FAQ Summary.md	575	关于路径有几个重要的点：	There are a few important points about the path:
FAQ Summary.md	576	**文件夹名称中一定不要有空格。	**There must not be spaces in the folder name.
FAQ Summary.md	577	注意相对路径和绝对路径。	Note the relative and absolute paths.
FAQ Summary.md	578	多百度路径相关的知识。**	More knowledge related to Baidu path. **
FAQ Summary.md	579
FAQ Summary.md	580	**所有的路径问题基本上都是根目录问题，好好查一下相对目录的概念！**	**All path problems are basically root directory problems. Check the concept of relative directories carefully! **
FAQ Summary.md	581	### u、和原版比较问题，你怎么和原版不一样啊？	### u. Compared with the original version, why are you different from the original?
FAQ Summary.md	582	**问：原版的代码是XXX，为什么你的代码是XXX？	**Q: The original code is XXX, why is your code XXX?
FAQ Summary.md	583	答：是啊……这要不怎么说我不是原版呢……**	A: Yes... That's why you say I'm not the original version... **
FAQ Summary.md	584
FAQ Summary.md	585	**问：你这个代码和原版比怎么样，可以达到原版的效果么？	**Q: How does your code compare to the original? Can it achieve the same effect as the original?
FAQ Summary.md	586	答：基本上可以达到，我都用voc数据测过，我没有好显卡，没有能力在coco上测试与训练。**	A: Basically, it can be achieved. I have tested it with VOC data. I don’t have a good graphics card and I don’t have the ability to test and train on Coco. **
FAQ Summary.md	587
FAQ Summary.md	588	### v、我的检测速度是xxx正常吗？我的检测速度还能增快吗？	### v. Is my detection speed xxx normal? Can my detection speed be increased?
FAQ Summary.md	589	**问：你这个FPS可以到达多少，可以到 XX FPS么？	**Q: What FPS can you reach? Can it reach XX FPS?
FAQ Summary.md	590	答：FPS和机子的配置有关，配置高就快，配置低就慢。**	A: FPS is related to the configuration of the machine. A high configuration means faster results, while a low configuration means slower results. **
FAQ Summary.md	591
FAQ Summary.md	592	**问：我的检测速度是xxx正常吗？我的检测速度还能增快吗？	**Q: Is my test speed xxx normal? Can my test speed be increased?
FAQ Summary.md	593	答：看配置，配置好速度就快，如果想要配置不变的情况下加快速度，就要修改网络了。**	A: It depends on the configuration. If the configuration is good, the speed will be fast. If you want to increase the speed without changing the configuration, you need to modify the network. **
FAQ Summary.md	594
FAQ Summary.md	595	**问：为什么论文中说速度可以达到XX，但是这里却没有？	**Q: Why does the paper say the speed can reach XX, but it is not here?
FAQ Summary.md	596	答：检查是否正确安装了tensorflow-gpu或者pytorch的gpu版本，如果已经正确安装，可以去利用time.time()的方法查看detect_image里面，哪一段代码耗时更长（不仅只有网络耗时长，其它处理部分也会耗时，如绘图等）。有些论文还会使用多batch进行预测，我并没有去实现这个部分。**	A: Check whether tensorflow-gpu or pytorch's gpu version is correctly installed. If it is correctly installed, you can use the time.time() method to check which part of the code in detect_image takes longer (not only the network, but also other processing parts, such as drawing). Some papers also use multiple batches for prediction, but I did not implement this part. **
FAQ Summary.md	597
FAQ Summary.md	598	### w、预测图片不显示问题	### w. Problem of predicted image not being displayed
FAQ Summary.md	599	**问：为什么你的代码在预测完成后不显示图片？只是在命令行告诉我有什么目标。	**Q: Why doesn't your code show the image after the prediction is done? Just tell me what the target is in the command line.
FAQ Summary.md	600	答：给系统安装一个图片查看器就行了。**	A: Just install an image viewer on your system. **
FAQ Summary.md	601
FAQ Summary.md	602	### x、算法评价问题（miou）	### x. Algorithm evaluation problem (miou)
FAQ Summary.md	603	**问：怎么计算miou？	**Q: How to calculate miou?
FAQ Summary.md	604	答：参考视频里的miou测量部分。**	A: Refer to the miou measurement section in the video. **
FAQ Summary.md	605
FAQ Summary.md	606	**问：怎么计算Recall、Precision指标。	**Q: How to calculate Recall and Precision indicators.
FAQ Summary.md	607	答：现有的代码还无法获得，需要各位同学理解一下混淆矩阵的概念，然后自行计算一下。**	A: The existing code is not available yet. You need to understand the concept of confusion matrix and calculate it yourself. **
FAQ Summary.md	608
FAQ Summary.md	609	### y、UP，怎么优化模型啊？我想提升效果	### y, UP, how to optimize the model? I want to improve the effect
FAQ Summary.md	610	**问：up，怎么修改模型啊，我想发个小论文！	**Question: Up, how do I modify the model? I want to publish a small paper!
FAQ Summary.md	611	答：建议目标检测中的yolov4论文，作为一个大型调参现场非常有参考意义，使用了很多tricks。我能给的建议就是多看一些经典模型，然后拆解里面的亮点结构并使用。**	A: I recommend the Yolov4 paper on target detection. It is a very useful reference for large-scale parameter adjustment and uses a lot of tricks. My advice is to look at more classic models, disassemble the highlights and use them. **
FAQ Summary.md	612
FAQ Summary.md	613	### z、部署问题（ONNX、TensorRT等）	### z, deployment issues (ONNX, TensorRT, etc.)
FAQ Summary.md	614	我没有具体部署到手机等设备上过，所以很多部署问题我并不了解……	I have never deployed it to a mobile phone or other device, so I don’t understand many deployment issues...
FAQ Summary.md	615
FAQ Summary.md	616	## 5、交流群问题	## 5. Communication group issues
FAQ Summary.md	617	**问：up，有没有QQ群啥的呢？	**Question: up, is there any QQ group or something?
FAQ Summary.md	618	答：没有没有，我没有时间管理QQ群……**	A: No, no, I don’t have time to manage the QQ group…**
FAQ Summary.md	619
FAQ Summary.md	620	## 6、怎么学习的问题	## 6. How to learn
FAQ Summary.md	621	**问：up，你的学习路线怎么样的？我是个小白我要怎么学？	**Q: Up, what is your learning path? I am a beginner, how should I learn?
FAQ Summary.md	622	答：这里有几点需要注意哈	A: There are a few points to note here.
FAQ Summary.md	623	1、我不是高手，很多东西我也不会，我的学习路线也不一定适用所有人。	1. I am not an expert, I don’t know many things, and my learning path may not be suitable for everyone.
FAQ Summary.md	624	2、我实验室不做深度学习，所以我很多东西都是自学，自己摸索，正确与否我也不知道。	2. My lab doesn’t do deep learning, so I’ve learned a lot of things by myself and figured it out on my own. I don’t know whether it’s correct or not.
FAQ Summary.md	625	3、我个人觉得学习更靠自学**	3. I personally think that learning depends more on self-study**
FAQ Summary.md	626	学习路线的话，我是先学习了莫烦的python教程，从tensorflow、keras、pytorch入门，入门完之后学的SSD，YOLO，然后了解了很多经典的卷积网，后面就开始学很多不同的代码了，我的学习方法就是一行一行的看，了解整个代码的执行流程，特征层的shape变化等，花了很多时间也没有什么捷径，就是要花时间吧。	In terms of learning route, I first studied Mofan's python tutorial, starting with tensorflow, keras, and pytorch. After that, I learned SSD, YOLO, and then learned a lot of classic convolutional networks. Later, I started to learn a lot of different codes. My learning method is to read it line by line, understand the execution flow of the entire code, the shape changes of the feature layer, etc.…
README.md	1	## YOLOV8：You Only Look Once目标检测模型在pytorch当中的实现	## YOLOV8: You Only Look Once target detection model implementation in pytorch
README.md	2	---	---
README.md	3
README.md	4	## 目录	## Table of contents
README.md	5	1. [仓库更新 Top News](#仓库更新)	1. [Warehouse Update Top News](#WarehouseUpdate)
README.md	6	2. [相关仓库 Related code](#相关仓库)	2. [Related code](#Related warehouse)
README.md	7	3. [性能情况 Performance](#性能情况)	3. [Performance](#Performance)
README.md	8	4. [所需环境 Environment](#所需环境)	4. [Required Environment](#Required Environment)
README.md	9	5. [文件下载 Download](#文件下载)	5. [Download](#Download)
README.md	10	6. [训练步骤 How2train](#训练步骤)	6. [Training steps How2train](#Training steps)
README.md	11	7. [预测步骤 How2predict](#预测步骤)	7. [Prediction Steps How2predict](#Prediction Steps)
README.md	12	8. [评估步骤 How2eval](#评估步骤)	8. [Evaluation steps How2eval](#Evaluation steps)
README.md	13	9. [参考资料 Reference](#Reference)	9. [Reference](#Reference)
README.md	14
README.md	15	## Top News	## Top News
README.md	16	**`2023-03`**:**仓库创建，支持step、cos学习率下降法、支持adam、sgd优化器选择、支持学习率根据batch_size自适应调整、新增图片裁剪、支持多GPU训练、支持各个种类目标数量计算、支持heatmap、支持EMA。**	**`2023-03`**:**Warehouse creation, support for step, cos learning rate descent method, support for adam, sgd optimizer selection, support for adaptive adjustment of learning rate according to batch_size, new image cropping, support for multi-GPU training, support for calculation of the number of targets of various types, support for heatmap, support for EMA. **
README.md	17
README.md	18	## 相关仓库	## Related repositories
README.md	19	| 模型 | 路径 |	| Model | Path |
README.md	20	| :----- | :----- |	| :----- | :----- |
README.md	21	YoloV3 | https://github.com/bubbliiiing/yolo3-pytorch	YoloV3 | https://github.com/bubbliiiiing/yolo3-pytorch
README.md	22	Efficientnet-Yolo3 | https://github.com/bubbliiiing/efficientnet-yolo3-pytorch	Efficientnet-Yolo3 | https://github.com/bubbliiiiing/efficientnet-yolo3-pytorch
README.md	23	YoloV4 | https://github.com/bubbliiiing/yolov4-pytorch	YoloV4 | https://github.com/bubbliiiiing/yolov4-pytorch
README.md	24	YoloV4-tiny | https://github.com/bubbliiiing/yolov4-tiny-pytorch	YoloV4-tiny | https://github.com/bubbliiiiing/yolov4-tiny-pytorch
README.md	25	Mobilenet-Yolov4 | https://github.com/bubbliiiing/mobilenet-yolov4-pytorch	Mobilenet-Yolov4 | https://github.com/bubbliiiiing/mobilenet-yolov4-pytorch
README.md	26	YoloV5-V5.0 | https://github.com/bubbliiiing/yolov5-pytorch	YoloV5-V5.0 | https://github.com/bubbliiiiing/yolov5-pytorch
README.md	27	YoloV5-V6.1 | https://github.com/bubbliiiing/yolov5-v6.1-pytorch	YoloV5-V6.1 | https://github.com/bubbliiiiing/yolov5-v6.1-pytorch
README.md	28	YoloX | https://github.com/bubbliiiing/yolox-pytorch	YoloX | https://github.com/bubbliiiiing/yolox-pytorch
README.md	29	YoloV7 | https://github.com/bubbliiiing/yolov7-pytorch	YoloV7 | https://github.com/bubbliiiiing/yolov7-pytorch
README.md	30	YoloV7-tiny | https://github.com/bubbliiiing/yolov7-tiny-pytorch	YoloV7-tiny | https://github.com/bubbliiiiing/yolov7-tiny-pytorch
README.md	31
README.md	32	## 性能情况	## Performance
README.md	33	| 训练数据集 | 权值文件名称 | 测试数据集 | 输入图片大小 | mAP 0.5:0.95 | mAP 0.5 |	| Training dataset | Weight file name | Test dataset | Input image size | mAP 0.5:0.95 | mAP 0.5 |
README.md	34	| :-----: | :-----: | :------: | :------: | :------: | :-----: |	| :-----: | :-----: | :------: | :------: | :------: | :----- : |
README.md	35	| COCO-Train2017 | [yolov8_n.pth](https://github.com/bubbliiiing/yolov8-pytorch/releases/download/v1.0/yolov8_n.pth) | COCO-Val2017 | 640x640 | 36.7 | 52.1	| COCO-Train2017 | [yolov8_n.pth](https://github.com/bubbliiiiing/yolov8-pytorch/releases/download/v1.0/yolov8_n.pth) | COCO-Val2017 | 640x640 | 36.7 | 52.1
README.md	36	| COCO-Train2017 | [yolov8_s.pth](https://github.com/bubbliiiing/yolov8-pytorch/releases/download/v1.0/yolov8_s.pth) | COCO-Val2017 | 640x640 | 44.1 | 61.0	| COCO-Train2017 | [yolov8_s.pth](https://github.com/bubbliiiiing/yolov8-pytorch/releases/download/v1.0/yolov8_s.pth) | COCO-Val2017 | 640x640 | 44.1 | 61.0
README.md	37	| COCO-Train2017 | [yolov8_m.pth](https://github.com/bubbliiiing/yolov8-pytorch/releases/download/v1.0/yolov8_m.pth) | COCO-Val2017 | 640x640 | 49.3 | 66.3	| COCO-Train2017 | [yolov8_m.pth](https://github.com/bubbliiiiing/yolov8-pytorch/releases/download/v1.0/yolov8_m.pth) | COCO-Val2017 | 640x640 | 49.3 | 66.3
README.md	38	| COCO-Train2017 | [yolov8_l.pth](https://github.com/bubbliiiing/yolov8-pytorch/releases/download/v1.0/yolov8_l.pth) | COCO-Val2017 | 640x640 | 52.0 | 68.9	COCO-Train2017 | [yolov8_l.pth](https://github.com/bubbliiiiing/yolov8-pytorch/releases/download/v1.0/yolov8_l.pth) | COCO-Val2017 | 640x640 | 52.0 | 68.9
README.md	39	| COCO-Train2017 | [yolov8_x.pth](https://github.com/bubbliiiing/yolov8-pytorch/releases/download/v1.0/yolov8_x.pth) | COCO-Val2017 | 640x640 | 52.9 | 69.9	| COCO-Train2017 | [yolov8_x.pth](https://github.com/bubbliiiiing/yolov8-pytorch/releases/download/v1.0/yolov8_x.pth) | COCO-Val2017 | 640x640 | 52.9 | 69.9
README.md	40
README.md	41	## 所需环境	## Required environment
README.md	42	torch==1.2.0	torch==1.2.0
README.md	43	为了使用amp混合精度，推荐使用torch1.7.1以上的版本。	In order to use amp mixed precision, it is recommended to use torch1.7.1 or above.
README.md	44
README.md	45	## 文件下载	## File Download
README.md	46	训练所需的权值可在百度网盘中下载。	The weights required for training can be downloaded from Baidu Netdisk.
README.md	47	链接: https://pan.baidu.com/s/1-khkEUiH-J3YJHVaYuuVbw	Link: https://pan.baidu.com/s/1-khkEUiH-J3YJHVaYuuVbw
README.md	48	提取码: ss9t	Extraction code: ss9t
README.md	49
README.md	50	VOC数据集下载地址如下，里面已经包括了训练集、测试集、验证集（与测试集一样），无需再次划分：	The VOC dataset download address is as follows. It already includes the training set, test set, and validation set (the same as the test set), so there is no need to divide it again:
README.md	51	链接: https://pan.baidu.com/s/19Mw2u_df_nBzsC2lg20fQA	Link: https://pan.baidu.com/s/19Mw2u_df_nBzsC2lg20fQA
README.md	52	提取码: j5ge	Extraction code: j5ge
README.md	53
README.md	54	## 训练步骤	## Training steps
README.md	55	### a、训练VOC07+12数据集	### a. Training VOC07+12 dataset
README.md	56	1. 数据集的准备	1. Dataset Preparation
README.md	57	**本文使用VOC格式进行训练，训练前需要下载好VOC07+12的数据集，解压后放在根目录**	**This article uses VOC format for training. Before training, you need to download the VOC07+12 dataset and put it in the root directory after decompression**
README.md	58
README.md	59	2. 数据集的处理	2. Dataset Processing
README.md	60	修改voc_annotation.py里面的annotation_mode=2，运行voc_annotation.py生成根目录下的2007_train.txt和2007_val.txt。	Modify annotation_mode=2 in voc_annotation.py and run voc_annotation.py to generate 2007_train.txt and 2007_val.txt in the root directory.
README.md	61
README.md	62	3. 开始网络训练	3. Start network training
README.md	63	train.py的默认参数用于训练VOC数据集，直接运行train.py即可开始训练。	The default parameters of train.py are used to train the VOC dataset. You can start training by running train.py directly.
README.md	64
README.md	65	4. 训练结果预测	4. Training result prediction
README.md	66	训练结果预测需要用到两个文件，分别是yolo.py和predict.py。我们首先需要去yolo.py里面修改model_path以及classes_path，这两个参数必须要修改。	The training result prediction requires two files, yolo.py and predict.py. First, we need to modify the model_path and classes_path in yolo.py. These two parameters must be modified.
README.md	67	**model_path指向训练好的权值文件，在logs文件夹里。	**model_path points to the trained weights file in the logs folder.
README.md	68	classes_path指向检测类别所对应的txt。**	classes_path points to the txt file corresponding to the detection category. **
README.md	69	完成修改后就可以运行predict.py进行检测了。运行后输入图片路径即可检测。	After completing the modification, you can run predict.py for detection. After running, enter the image path to detect.
README.md	70
README.md	71	### b、训练自己的数据集	### b. Train your own dataset
README.md	72	1. 数据集的准备	1. Dataset Preparation
README.md	73	**本文使用VOC格式进行训练，训练前需要自己制作好数据集，**	**This article uses the VOC format for training. You need to make your own data set before training.**
README.md	74	训练前将标签文件放在VOCdevkit文件夹下的VOC2007文件夹下的Annotation中。	Before training, place the label file in the Annotation folder under the VOC2007 folder under the VOCdevkit folder.
README.md	75	训练前将图片文件放在VOCdevkit文件夹下的VOC2007文件夹下的JPEGImages中。	Before training, put the image files in the JPEGImages folder under the VOC2007 folder under the VOCdevkit folder.
README.md	76
README.md	77	2. 数据集的处理	2. Dataset Processing
README.md	78	在完成数据集的摆放之后，我们需要利用voc_annotation.py获得训练用的2007_train.txt和2007_val.txt。	After completing the arrangement of the data set, we need to use voc_annotation.py to obtain 2007_train.txt and 2007_val.txt for training.
README.md	79	修改voc_annotation.py里面的参数。第一次训练可以仅修改classes_path，classes_path用于指向检测类别所对应的txt。	Modify the parameters in voc_annotation.py. For the first training, you can only modify classes_path, which is used to point to the txt file corresponding to the detection category.
README.md	80	训练自己的数据集时，可以自己建立一个cls_classes.txt，里面写自己所需要区分的类别。	When training your own data set, you can create a cls_classes.txt file and write the categories you need to distinguish.
README.md	81	model_data/cls_classes.txt文件内容为：	The content of the model_data/cls_classes.txt file is:
README.md	82	```python	```Python
README.md	83	cat	cat
README.md	84	dog	dog
README.md	85	...	...
README.md	86	```	```
README.md	87	修改voc_annotation.py中的classes_path，使其对应cls_classes.txt，并运行voc_annotation.py。	Modify the classes_path in voc_annotation.py to correspond to cls_classes.txt, and run voc_annotation.py.
README.md	88
README.md	89	3. 开始网络训练	3. Start network training
README.md	90	**训练的参数较多，均在train.py中，大家可以在下载库后仔细看注释，其中最重要的部分依然是train.py里的classes_path。**	**There are many training parameters, all in train.py. You can read the comments carefully after downloading the library. The most important part is still the classes_path in train.py. **
README.md	91	**classes_path用于指向检测类别所对应的txt，这个txt和voc_annotation.py里面的txt一样！训练自己的数据集必须要修改！**	**classes_path is used to point to the txt file corresponding to the detection category. This txt file is the same as the txt file in voc_annotation.py! You must modify it to train your own dataset! **
README.md	92	修改完classes_path后就可以运行train.py开始训练了，在训练多个epoch后，权值会生成在logs文件夹中。	After modifying classes_path, you can run train.py to start training. After training multiple epochs, the weights will be generated in the logs folder.
README.md	93
README.md	94	4. 训练结果预测	4. Training result prediction
README.md	95	训练结果预测需要用到两个文件，分别是yolo.py和predict.py。在yolo.py里面修改model_path以及classes_path。	Two files are needed for training result prediction, namely yolo.py and predict.py. Modify model_path and classes_path in yolo.py.
README.md	96	**model_path指向训练好的权值文件，在logs文件夹里。	**model_path points to the trained weights file in the logs folder.
README.md	97	classes_path指向检测类别所对应的txt。**	classes_path points to the txt file corresponding to the detection category. **
README.md	98	完成修改后就可以运行predict.py进行检测了。运行后输入图片路径即可检测。	After completing the modification, you can run predict.py for detection. After running, enter the image path to detect.
README.md	99
README.md	100	## 预测步骤	## Prediction Step
README.md	101	### a、使用预训练权重	### a. Use pre-trained weights
README.md	102	1. 下载完库后解压，在百度网盘下载权值，放入model_data，运行predict.py，输入	1. After downloading the library, unzip it, download the weights from Baidu Netdisk, put them into model_data, run predict.py, and enter
README.md	103	```python	```Python
README.md	104	img/street.jpg	img/street.jpg
README.md	105	```	```
README.md	106	2. 在predict.py里面进行设置可以进行fps测试和video视频检测。	2. Set up in predict.py to perform fps testing and video detection.
README.md	107	### b、使用自己训练的权重	### b. Use your own trained weights
README.md	108	1. 按照训练步骤训练。	1. Follow the training steps.
README.md	109	2. 在yolo.py文件里面，在如下部分修改model_path和classes_path使其对应训练好的文件；**model_path对应logs文件夹下面的权值文件，classes_path是model_path对应分的类**。	2. In the yolo.py file, modify the model_path and classes_path in the following parts to correspond to the trained files; **model_path corresponds to the weight file under the logs folder, and classes_path is the class corresponding to model_path**.
README.md	110	```python	```Python
README.md	111	_defaults = {	_defaults = {
README.md	112	#--------------------------------------------------------------------------#	#------------------------------------------------ --------------------------#
README.md	113	# 使用自己训练好的模型进行预测一定要修改model_path和classes_path！	# Be sure to modify model_path and classes_path when using your own trained model for prediction!
README.md	114	# model_path指向logs文件夹下的权值文件，classes_path指向model_data下的txt	# model_path points to the weight file in the logs folder, and classes_path points to the txt file in model_data
README.md	115	#	#
README.md	116	# 训练好后logs文件夹下存在多个权值文件，选择验证集损失较低的即可。	# After training, there are multiple weight files in the logs folder. Select the one with lower loss in the validation set.
README.md	117	# 验证集损失较低不代表mAP较高，仅代表该权值在验证集上泛化性能较好。	# A lower validation set loss does not mean a higher mAP, it only means that the weight has better generalization performance on the validation set.
README.md	118	# 如果出现shape不匹配，同时要注意训练时的model_path和classes_path参数的修改	# If shape mismatch occurs, pay attention to the modification of model_path and classes_path parameters during training
README.md	119	#--------------------------------------------------------------------------#	#------------------------------------------------ --------------------------#
README.md	120	"model_path" : 'model_data/yolov8_s.pth',	"model_path" : 'model_data/yolov8_s.pth',
README.md	121	"classes_path" : 'model_data/coco_classes.txt',	"classes_path" : 'model_data/coco_classes.txt',
README.md	122	#---------------------------------------------------------------------#	#------------------------------------------------ ------------------#
README.md	123	# anchors_path代表先验框对应的txt文件，一般不修改。	# anchors_path represents the txt file corresponding to the prior frame and is generally not modified.
README.md	124	# anchors_mask用于帮助代码找到对应的先验框，一般不修改。	# anchors_mask is used to help the code find the corresponding prior box and is generally not modified.
README.md	125	#---------------------------------------------------------------------#	#------------------------------------------------ ------------------#
README.md	126	"anchors_path" : 'model_data/yolo_anchors.txt',	"anchors_path" : 'model_data/yolo_anchors.txt',
README.md	127	"anchors_mask" : [[6, 7, 8], [3, 4, 5], [0, 1, 2]],	"anchors_mask" : [[6, 7, 8], [3, 4, 5], [0, 1, 2]],
README.md	128	#---------------------------------------------------------------------#	#------------------------------------------------ ------------------#
README.md	129	# 输入图片的大小，必须为32的倍数。	# Input the image size, which must be a multiple of 32.
README.md	130	#---------------------------------------------------------------------#	#------------------------------------------------ ------------------#
README.md	131	"input_shape" : [640, 640],	"input_shape" : [640, 640],
README.md	132	#------------------------------------------------------#	#------------------------------------------------ -----#
README.md	133	# 所使用到的yolov8的版本：	# The version of yolov8 used:
README.md	134	# n : 对应yolov8_n	# n : corresponds to yolov8_n
README.md	135	# s : 对应yolov8_s	# s : corresponds to yolov8_s
README.md	136	# m : 对应yolov8_m	# m : corresponds to yolov8_m
README.md	137	# l : 对应yolov8_l	# l : corresponding to yolov8_l
README.md	138	# x : 对应yolov8_x	# x : corresponds to yolov8_x
README.md	139	#------------------------------------------------------#	#------------------------------------------------ -----#
README.md	140	"phi" : 's',	"phi" : 's',
README.md	141	#---------------------------------------------------------------------#	#------------------------------------------------ ------------------#
README.md	142	# 只有得分大于置信度的预测框会被保留下来	# Only prediction boxes with scores greater than the confidence level will be retained
README.md	143	#---------------------------------------------------------------------#	#------------------------------------------------ ------------------#
README.md	144	"confidence" : 0.5,	"confidence" : 0.5,
README.md	145	#---------------------------------------------------------------------#	#------------------------------------------------ ------------------#
README.md	146	# 非极大抑制所用到的nms_iou大小	# nms_iou size used for non-maximum suppression
README.md	147	#---------------------------------------------------------------------#	#------------------------------------------------ ------------------#
README.md	148	"nms_iou" : 0.3,	"nms_iou" : 0.3,
README.md	149	#---------------------------------------------------------------------#	#------------------------------------------------ ------------------#
README.md	150	# 该变量用于控制是否使用letterbox_image对输入图像进行不失真的resize，	# This variable is used to control whether letterbox_image is used to resize the input image without distortion.
README.md	151	# 在多次测试后，发现关闭letterbox_image直接resize的效果更好	# After multiple tests, it was found that closing letterbox_image and resizing directly would produce better results
README.md	152	#---------------------------------------------------------------------#	#------------------------------------------------ ------------------#
README.md	153	"letterbox_image" : True,	"letterbox_image" : True,
README.md	154	#-------------------------------#	#--------------------------------#
README.md	155	# 是否使用Cuda	# Whether to use Cuda
README.md	156	# 没有GPU可以设置成False	# No GPU can be set to False
README.md	157	#-------------------------------#	#--------------------------------#
README.md	158	"cuda" : True,	"cuda" : True,
README.md	159	}	}
README.md	160	```	```
README.md	161	3. 运行predict.py，输入	3. Run predict.py and enter
README.md	162	```python	```Python
README.md	163	img/street.jpg	img/street.jpg
README.md	164	```	```
README.md	165	4. 在predict.py里面进行设置可以进行fps测试和video视频检测。	4. Set up predict.py to perform fps testing and video detection.
README.md	166
README.md	167	## 评估步骤	## Evaluation steps
README.md	168	### a、评估VOC07+12的测试集	### a. Evaluate the test set of VOC07+12
README.md	169	1. 本文使用VOC格式进行评估。VOC07+12已经划分好了测试集，无需利用voc_annotation.py生成ImageSets文件夹下的txt。	1. This article uses the VOC format for evaluation. VOC07+12 has already divided the test set, so there is no need to use voc_annotation.py to generate the txt file in the ImageSets folder.
README.md	170	2. 在yolo.py里面修改model_path以及classes_path。**model_path指向训练好的权值文件，在logs文件夹里。classes_path指向检测类别所对应的txt。**	2. Modify model_path and classes_path in yolo.py. **model_path points to the trained weight file in the logs folder. classes_path points to the txt file corresponding to the detection category. **
README.md	171	3. 运行get_map.py即可获得评估结果，评估结果会保存在map_out文件夹中。	3. Run get_map.py to get the evaluation results, which will be saved in the map_out folder.
README.md	172
README.md	173	### b、评估自己的数据集	### b. Evaluate your own dataset
README.md	174	1. 本文使用VOC格式进行评估。	1. This paper uses the VOC format for evaluation.
README.md	175	2. 如果在训练前已经运行过voc_annotation.py文件，代码会自动将数据集划分成训练集、验证集和测试集。如果想要修改测试集的比例，可以修改voc_annotation.py文件下的trainval_percent。trainval_percent用于指定(训练集+验证集)与测试集的比例，默认情况下 (训练集+验证集):测试集 = 9:1。train_percent用于指定(训练集+验证集)中训练集与验证集的比例，默认情况下 训练集:验证集 = 9:1。	2. If you have run the voc_annotation.py file before training, the code will automatically divide the dataset into training set, validation set, and test set. If you want to change the ratio of the test set, you can modify the trainval_percent in the voc_annotation.py file. trainval_percent is used to specify the ratio of (training set + validation set) to the test set. By default, (training set …
README.md	176	3. 利用voc_annotation.py划分测试集后，前往get_map.py文件修改classes_path，classes_path用于指向检测类别所对应的txt，这个txt和训练时的txt一样。评估自己的数据集必须要修改。	3. After using voc_annotation.py to divide the test set, go to the get_map.py file to modify the classes_path. The classes_path is used to point to the txt file corresponding to the detection category. This txt file is the same as the txt file used during training. You must modify it to evaluate your own dataset.
README.md	177	4. 在yolo.py里面修改model_path以及classes_path。**model_path指向训练好的权值文件，在logs文件夹里。classes_path指向检测类别所对应的txt。**	4. Modify model_path and classes_path in yolo.py. **model_path points to the trained weight file in the logs folder. classes_path points to the txt file corresponding to the detection category. **
README.md	178	5. 运行get_map.py即可获得评估结果，评估结果会保存在map_out文件夹中。	5. Run get_map.py to get the evaluation results, which will be saved in the map_out folder.
README.md	179
README.md	180	## Reference	## Reference
README.md	181	https://github.com/ultralytics/ultralytics	https://github.com/ultralytics/ultralytics
train.py	Line 12	对数据集进行训练	Train the dataset
train.py	Line 36	使用Cuda	Use Cuda
train.py	Line 53	固定随机种子	Fix random seed
train.py	Line 95	训练的类别路径	Path of classes for training
train.py	Line 164	数据增强 - 马赛克	Data augmentation - Mosaic
train.py	Line 345	保存权重和模型	Save weights and model
predict.py	Top section	单张图片预测	Single image prediction
predict.py	Line 28	视频检测	Video detection
predict.py	Line 56	检测摄像头	Detect the camera
predict.py	Line 113	FPS测试	FPS test
utils_bbox.py	Function dist2bbox, docstring	左上右下	Top left and bottom right
utils_bbox.py	Function yolo_correct_boxes	有效图像区域	Effective image region
README.md	Section: 常见问题汇总.md	常见问题汇总	FAQ Summary
